# Supplementary material for: How representative are FLUXNET measurements of surface fluxes during temperature extremes?
Source: Copernicus journal article supplement (doi:10.5194/bg-16-1829-2019), 2019-04-30
Supplement: Supplementary file 1 [file bg-16-1829-2019-supplement.zip]

Archive with 3 entries (3 files):
- reference list.pdf
- vanderHorst.supplementary.revised.pdf
- bg-16-1829-2019-supplement-title-page.pdf
