# Supplementary material for: How representative are FLUXNET measurements of surface fluxes during temperature extremes?
Source: Copernicus journal article supplement (doi:10.5194/bg-16-1829-2019), 2019-04-30
Supplement: Supplementary file 1 [file bg-16-1829-2019-supplement.zip › bg-16-1829-2019-supplement-title-page.pdf]

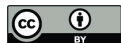

## *Supplement of*

# **How representative are FLUXNET measurements of surface fluxes during temperature extremes?**

**Sophie V. J. van der Horst et al.**

*Correspondence to:* Andrew J. Pitman ([a.pitman@unsw.edu.au](mailto:a.pitman@unsw.edu.au))

- [bg-16-1829-2019-supplement-title-page.pdf](#)
- [reference list.pdf](#)
- [vanderHorst.supplementary.revised.pdf](#)

The copyright of individual parts of the supplement might differ from the CC BY 4.0 License.
