# Supplementary material for: How representative are FLUXNET measurements of surface fluxes during temperature extremes?
Source: Copernicus journal article supplement (doi:10.5194/bg-16-1829-2019), 2019-04-30
Supplement: Supplementary file 1 [file bg-16-1829-2019-supplement.zip › reference list.pdf]

Supplementary Table 4: FLUXNET citations

Sites, vegetation types, locations and studied periods of flux sites used in this analysis. All data originally from [www.fluxdata.org](http://www.fluxdata.org). Source: FLUXNET2015 (Fl); LaThuille (La). Vegetation types: deciduous broadleaf forest (DBF); evergreen broadleaf forest (EBF); evergreen needleleaf forest (ENF); grassland (GRA); mixed deciduous and evergreen needleleaf forest (MF); savanna ecosystem (SAV); shrub ecosystem (SHR); wetland (WET).

| Site code | Source | Veg type | Latitude | Longitude | Period    | Reference                   |
|-----------|--------|----------|----------|-----------|-----------|-----------------------------|
| AR-SLu    | Fl     | MF       | -33.4648 | -66.4598  | 2009-2011 | (Ulke et al., 2015)         |
| AR-Vir    | Fl     | ENF      | -28.2395 | -56.1886  | 2009-2012 | (Posse et al., 2016)        |
| AT-Neu    | Fl     | GRA      | 47.1167  | 11.3175   | 2002-2012 | (Wohlfahrt et al., 2008)    |
| AU-Ade    | Fl     | WSA      | -13.0769 | 131.117   | 2007-2009 | (Beringer et al., 2011)     |
| AU-ASM    | Fl     | ENF      | -22.2830 | 133.2490  | 2010-2013 | (Cleverly et al., 2013)     |
| AU-Cpr    | Fl     | SAV      | -34.0021 | 140.5891  | 2010-2014 | (Meyer et al., 2015)        |
| AU-Cum    | Fl     | EBF      | -33.6133 | 150.7225  | 2012-2014 | (Beringer et al., 2016)     |
| AU-DaP    | Fl     | GRA      | -14.0633 | 131.3181  | 2007-2013 | (Beringer et al., 2011)     |
| AU-DaS    | Fl     | SAV      | -14.1593 | 131.3881  | 2008-2014 | (Hutley et al., 2011)       |
| AU-Dry    | Fl     | SAV      | -15.2588 | 132.3706  | 2008-2014 | (Cernusak et al., 2011)     |
| AU-Emr    | Fl     | GRA      | -23.8587 | 148.4746  | 2011-2013 | (Schroder et al., 2014)     |
| AU-Fog    | Fl     | WET      | -12.5452 | 131.3072  | 2006-2008 | (Beringer et al., 2013)     |
| AU-Gin    | Fl     | WSA      | -31.3764 | 115.7138  | 2011-2014 | (Beringer et al., 2016)     |
| AU-GWW    | Fl     | SAV      | -30.1913 | 120.6541  | 2013-2014 | (Prober et al., 2012)       |
| AU-How    | Fl     | SAV      | -12.4943 | 131.1523  | 2001-2014 | (Cernusak, 2007)            |
| AU-Lox    | Fl     | DBF      | -34.4704 | 140.6551  | 2008-2009 | (Stevens et al., 2011)      |
| AU-RDF    | Fl     | WSA      | -14.5636 | 132.4776  | 2011-2013 | (Bristow et al., 2016)      |
| AU-Rig    | Fl     | GRA      | -36.6499 | 145.5759  | 2011-2014 | (Beringer et al., 2016)     |
| AU-Rob    | Fl     | EBF      | -17.1175 | 145.6301  | 2014-2014 | (Beringer et al., 2016)     |
| AU-Stp    | Fl     | GRA      | -17.1507 | 133.3502  | 2008-2014 | (Beringer et al., 2011)     |
| AU-TTE    | Fl     | OSH      | -22.2870 | 133.6400  | 2012-2013 | (Cleverly et al., 2016)     |
| AU-Tum    | Fl     | EBF      | -35.6566 | 148.1517  | 2001-2014 | (van Gorsel et al., 2008)   |
| AU-Wac    | Fl     | EBF      | -37.4259 | 145.1878  | 2005-2008 | (Kilinc et al., 2013)       |
| AU-Whr    | Fl     | EBF      | -36.6732 | 145.0294  | 2011-2014 | (McHugh et al., 2017)       |
| AU-Wom    | Fl     | EBF      | -37.4222 | 144.0944  | 2010-2012 | (Hinko-Najera et al., 2017) |
| AU-Ync    | Fl     | GRA      | -34.9893 | 146.2907  | 2012-2014 | (Yee et al., 2015)          |
| BE-Bra    | Fl     | MF       | 51.3092  | 4.5206    | 1996-2014 | (Carrara et al., 2004)      |
| BE-Lon    | Fl     | CRO      | 50.5516  | 4.7461    | 2004-2014 | (Moureaux et al., 2006)     |
| BE-Vie    | Fl     | MF       | 50.3051  | 6.9981    | 1996-2014 | (Aubinet et al., 2001)      |
| BR-Sa3    | Fl     | EBF      | -3.0180  | -54.9714  | 2000-2004 | (Wick et al., 2005)         |
| BW-Ma1    | La     | SAV      | -19.9155 | 23.5605   | 1999-2001 | (Veenendaal et al., 2004)   |
| CA-Man    | Fl     | ENF      | 55.8796  | -98.4808  | 1994-2008 | (Dunn et al., 2007)         |
| CA-Mer    | La     | WET      | 45.4094  | -75.5286  | 1998-2005 | (Lafleur et al., 2003)      |
| CA-NS1    | Fl     | ENF      | 55.8792  | -98.4839  | 2001-2005 | (Goulden et al., 2006)      |
| CA-NS2    | Fl     | ENF      | 55.9058  | -98.5247  | 2001-2005 | (Goulden et al., 2006)      |

|        |    |     |         |           |           |                                |
|--------|----|-----|---------|-----------|-----------|--------------------------------|
| CA-NS3 | Fl | ENF | 55.9117 | -98.3822  | 2001-2005 | (Goulden et al., 2006)         |
| CA-NS4 | Fl | ENF | 55.9144 | -98.3806  | 2002-2005 | (Goulden et al., 2006)         |
| CA-NS5 | Fl | ENF | 55.8631 | -98.4850  | 2001-2005 | (Goulden et al., 2006)         |
| CA-NS6 | Fl | OSH | 55.9169 | -98.9644  | 2001-2005 | (Goulden et al., 2006)         |
| CA-NS7 | Fl | OSH | 56.6358 | -99.9483  | 2002-2005 | (Goulden et al., 2006)         |
| CA-Qcu | La | ENF | 49.2671 | -74.0365  | 2001-2006 | (Giasson et al., 2006)         |
| CA-Qfo | Fl | ENF | 49.6925 | -74.3421  | 2003-2010 | (Bergeron et al., 2007)        |
| CA-SF1 | Fl | ENF | 54.4850 | -105.8176 | 2003-2006 | (Mkhabela et al., 2009)        |
| CA-SF2 | Fl | ENF | 54.2539 | -105.8775 | 2001-2005 | (Mkhabela et al., 2009)        |
| CA-SF3 | Fl | ENF | 54.0916 | -106.0053 | 2001-2006 | (Mkhabela et al., 2009)        |
| CH-Cha | Fl | GRA | 47.2102 | 8.4104    | 2005-2014 | (Merbold et al., 2014)         |
| CH-Dav | Fl | ENF | 46.8153 | 9.8559    | 1997-2014 | (Zielis et al., 2014)          |
| CH-Fru | Fl | GRA | 47.1158 | 8.5378    | 2005-2014 | (Imer et al., 2013)            |
| CH-Lae | Fl | MF  | 47.4781 | 8.3650    | 2004-2014 | (Etzold et al., 2011)          |
| CH-Oe1 | Fl | GRA | 47.2858 | 7.7319    | 2002-2008 | (Ammann et al., 2007)          |
| CH-Oe2 | Fl | CRO | 47.2863 | 7.7343    | 2004-2014 | (Dietiker et al., 2010)        |
| CN-Cha | Fl | MF  | 42.4025 | 128.0958  | 2003-2005 | (Guan et al., 2006)            |
| CN-Cng | Fl | GRA | 44.5934 | 123.5092  | 2007-2010 | --                             |
| CN-Dan | Fl | GRA | 30.4978 | 91.0664   | 2004-2005 | (Shi et al., 2006)             |
| CN-Din | Fl | EBF | 21.1733 | 112.5361  | 2003-2005 | (Yan et al., 2013)             |
| CN-Du2 | Fl | GRA | 42.0467 | 116.2836  | 2006-2008 | (Chen et al., 2009)            |
| CN-HaM | Fl | GRA | 37.3700 | 101.1800  | 2002-2004 | (Kato et al., 2006)            |
| CN-Qia | Fl | ENF | 26.7414 | 115.0581  | 2003-2005 | (Wen et al., 2010)             |
| CN-Sw2 | Fl | GRA | 41.7902 | 111.8971  | 2010-2012 | (Shao et al., 2017)            |
| CZ-BK1 | Fl | ENF | 49.5021 | 18.5369   | 2004-2008 | (Acosta et al., 2013)          |
| CZ-BK2 | Fl | GRA | 49.4944 | 18.5429   | 2006-2006 | --                             |
| CZ-wet | Fl | WET | 49.0247 | 14.7704   | 2006-2014 | (Dušek et al., 2012)           |
| DE-Akm | Fl | WET | 53.8662 | 13.6834   | 2009-2014 | --                             |
| DE-Bay | La | ENF | 50.1419 | 11.8669   | 1997-1999 | (Valentini et al., 2000)       |
| DE-Geb | Fl | CRO | 51.1001 | 10.9143   | 2001-2014 | (Anthoni et al., 2004)         |
| DE-Gri | Fl | GRA | 50.9500 | 13.5126   | 2004-2014 | (Prescher et al., 2010)        |
| DE-Hai | Fl | DBF | 51.0792 | 10.4530   | 2000-2012 | (Knohl et al., 2003)           |
| DE-Kli | Fl | CRO | 50.8931 | 13.5224   | 2004-2014 | (Prescher et al., 2010)        |
| DE-Lkb | Fl | ENF | 49.0996 | 13.3047   | 2009-2013 | (Lindauer et al., 2014)        |
| DE-Meh | La | GRA | 51.2753 | 10.6555   | 2003-2006 | (Don et al., 2009)             |
| DE-Obe | Fl | ENF | 50.7867 | 13.7213   | 2008-2014 | --                             |
| DE-RuR | Fl | GRA | 50.6219 | 6.3041    | 2011-2014 | (Post et al., 2015)            |
| DE-RuS | Fl | CRO | 50.8659 | 6.4472    | 2011-2014 | (Mauder et al., 2013)          |
| DE-Seh | Fl | CRO | 50.8706 | 6.4497    | 2007-2010 | (Schmidt et al., 2012)         |
| DE-SfN | Fl | WET | 47.8064 | 11.3275   | 2012-2014 | (Hommeltenberg et al., 2014)   |
| DE-Spw | Fl | WET | 51.8923 | 14.0337   | 2010-2014 | --                             |
| DE-Tha | Fl | ENF | 50.9624 | 13.5652   | 1996-2014 | (Grünwald and Bernhofer, 2007) |
| DE-Wet | La | ENF | 50.4535 | 11.4575   | 2002-2006 | (Rebmann et al., 2010)         |
| DK-Fou | Fl | CRO | 56.4842 | 9.5872    | 2005-2005 | --                             |

|        |    |     |         |          |                        |                                    |
|--------|----|-----|---------|----------|------------------------|------------------------------------|
| DK-Lva | La | GRA | 55.6833 | 12.0833  | 2005-2006              | (Gilmanov et al., 2007)            |
| DK-NuF | Fl | WET | 64.1308 | -51.3861 | 2008-2014              | (Westergaard-Nielsen et al., 2013) |
| DK-Ris | La | CRO | 55.5303 | 12.972   | 2004-2005              | (Chen et al., 2010)                |
| DK-Sor | Fl | DBF | 55.4859 | 11.6446  | 1996-2014              | (Pilegaard et al., 2003)           |
| DK-ZaF | Fl | WET | 74.4814 | -20.5545 | 2008-2011              | (Stiegler et al., 2016)            |
| DK-ZaH | Fl | GRA | 74.4732 | -20.5503 | 2000-2014              | (Lund et al., 2012)                |
| ES-Es1 | La | ENF | 39.3460 | -0.3188  | 1999-2006              | (Reichstein et al., 2005)          |
| ES-Es2 | La | CRO | 39.2755 | -0.3152  | 2005-2006              | (Chen et al., 2010)                |
| ES-LgS | Fl | OSH | 37.0979 | -2.9658  | 2007-2009              | (Reverter et al., 2010)            |
| ES-Lma | La | SAV | 39.9415 | -5.77    | 2004-2006              | (Yi et al., 2010)                  |
| ES-Ln2 | Fl | OSH | 36.9695 | -3.4758  | 2009-2009              | (Serrano-Ortiz et al., 2011)       |
| ES-Vda | La | ENF | 39.35   | -0.32    | 2004-2006              | (Migliavacca et al., 2011)         |
| FI-Hyy | Fl | ENF | 61.8474 | 24.2948  | 1996-2014              | (Suni et al., 2003)                |
| FI-Jok | Fl | CRO | 60.8986 | 23.5135  | 2000-2003              | (Lohila, 2004)                     |
| FI-Kaa | La | WET | 69.1407 | 27.2950  | 2000-2006              | (Aurela et al., 2002)              |
| FI-Lom | Fl | WET | 67.9972 | 24.2092  | 2007-2009              | (Aurela et al., 2015)              |
| FI-Sod | Fl | ENF | 67.3619 | 26.6378  | 2001-2014              | (Thum et al., 2007)                |
| FR-Fon | Fl | DBF | 48.4764 | 2.7801   | 2005-2014              | (Delpierre et al., 2015)           |
| FR-Gri | Fl | CRO | 48.8442 | 1.9519   | 2004-2013              | (Loubet et al., 2011)              |
| FR-Hes | La | DBF | 48.6742 | 7.0646   | 1997-2006              | (Granier et al., 2000)             |
| FR-LBr | Fl | ENF | 44.7171 | -0.7693  | 1996-2008              | (Berbigier et al., 2001)           |
| FR-Lq1 | La | GRA | 45.6441 | 2.7370   | 2004-2006              | (Gilmanov et al., 2007)            |
| FR-Lq2 | La | GRA | 45.6392 | 2.7370   | 2004-2006              | (Gilmanov et al., 2007)            |
| FR-Pue | Fl | EBF | 43.7414 | 3.5958   | 2000-2014              | (Rambal et al., 2004)              |
| GF-Guy | Fl | EBF | 5.2788  | -52.9249 | 2004-2014              | (Bonal et al., 2008)               |
| HU-Bug | La | GRA | 46.6911 | 19.6013  | 2002-2006              | (Gilmanov et al., 2007)            |
| HU-Mat | La | GRA | 47.8496 | 19.7260  | 2004-2006              | (Pinter et al., 2008)              |
| ID-Pag | La | EBF | -2.3450 | 114.036  | 2002-2003              | (Hirano et al., 2007)              |
| IE-Ca1 | La | CRO | 52.8588 | -6.9181  | 2004-2006              | (Gilmanov et al., 2007)            |
| IE-Dri | La | GRA | 51.99   | -8.75    | 2003-2005              | (Jaksic et al., 2006)              |
| IL-Yat | La | ENF | 31.3450 | 30.0515  | 2001-2002<br>2006-2006 | (Reichstein et al., 2003)          |
| IT-Amp | La | GRA | 41.9041 | 13.6052  | 2002-2006              | (Gilmanov et al., 2007)            |
| IT-BCi | Fl | CRO | 40.5238 | 14.9574  | 2004-2014              | (Vitale et al., 2015)              |
| IT-CA1 | Fl | DBF | 42.3804 | 12.0266  | 2011-2014              | (Sabbatini et al., 2016a)          |
| IT-CA2 | Fl | CRO | 42.3772 | 12.0260  | 2011-2014              | (Sabbatini et al., 2016b)          |
| IT-CA3 | Fl | DBF | 42.3800 | 12.0222  | 2011-2014              | (Sabbatini et al., 2016c)          |
| IT-Col | Fl | DBF | 41.8494 | 13.5881  | 1996-2014              | (Valentini et al., 1996)           |
| IT-Cp2 | Fl | EBF | 41.7043 | 12.3573  | 2012-2014              | (Fares et al., 2014)               |
| IT-Cpz | Fl | EBF | 41.7052 | 12.3761  | 1997-2009              | (Garbulsky et al., 2008)           |
| IT-Isp | Fl | DBF | 45.8126 | 8.6336   | 2013-2014              | (Ferréa et al., 2012)              |
| IT-La2 | Fl | ENF | 45.9542 | 11.2853  | 2000-2002              | (Marcolla et al., 2003a)           |
| IT-Lav | Fl | ENF | 45.9562 | 11.2813  | 2003-2014              | (Marcolla et al., 2003b)           |
| IT-Lma | La | GRA | 45.5813 | 7.1546   | 2003-2006              | --                                 |
| IT-Mal | La | GRA | 46.1167 | 11.7028  | 2003-2004              | (Gilmanov et al., 2007)            |

|        |    |     |         |           |                                     |                            |
|--------|----|-----|---------|-----------|-------------------------------------|----------------------------|
| IT-MBo | Fl | GRA | 46.0247 | 11.0458   | 2003-2013                           | (Migliavacca et al., 2009) |
| IT-Noe | Fl | CSH | 40.6061 | 8.1515    | 2004-2014                           | (Papale et al., 2014)      |
| IT-Non | La | DBF | 44.6898 | 11.0887   | 2001-2002<br>2006-2006              | (Reichstein et al., 2005)  |
| IT-PT1 | Fl | DBF | 45.2009 | 9.0610    | 2002-2004                           | (Migliavacca et al., 2009) |
| IT-Ren | Fl | ENF | 46.5869 | 11.4337   | 1998-2013                           | (Montagnani et al., 2009)  |
| IT-Ro1 | Fl | DBF | 42.4081 | 11.9300   | 2002-2008                           | (Rey et al., 2002)         |
| IT-Ro2 | Fl | DBF | 42.3903 | 11.9209   | 2002-2008<br>2010-2012              | (Tedeschi et al., 2006)    |
| IT-SR2 | Fl | ENF | 43.7320 | 10.2910   | 2013-2014                           | (Hoshika et al., 2017)     |
| IT-SRo | Fl | ENF | 43.7279 | 10.2844   | 1999-2012                           | (Chiesi et al., 2005)      |
| IT-Tor | Fl | GRA | 45.8444 | 7.5781    | 2008-2014                           | (Galvagno et al., 2013)    |
| JP-MBF | Fl | DBF | 44.3869 | 142.3186  | 2003-2005                           | (Matsumoto et al., 2008a)  |
| JP-SMF | Fl | MF  | 35.2617 | 137.0788  | 2002-2006                           | (Matsumoto et al., 2008b)  |
| NL-Ca1 | La | GRA | 51.9710 | 4.9270    | 2003-2006                           | (Gilmanov et al., 2007)    |
| NL-Hor | Fl | GRA | 52.2404 | 5.0713    | 2004-2011                           | (Jacobs et al., 2007)      |
| NL-Lan | La | CRO | 51.9536 | 4.9029    | 2005-2005                           | --                         |
| NL-Loo | Fl | ENF | 52.1666 | 5.7436    | 1996-2013                           | (Moors, 2012)              |
| NO-Adv | Fl | WET | 78.1860 | 15.9230   | 2012-2014                           | --                         |
| NO-Blv | Fl | SNO | 78.9216 | 11.8311   | 2008-2009                           | --                         |
| PL-Wet | La | WET | 52.7622 | 16.3094   | 2004-2005                           | (Chojnicki et al., 2007)   |
| PT-Esp | La | EBF | 38.6394 | -8.6018   | 2002-2006                           | --                         |
| PT-Mi1 | La | EBF | 38.5407 | -8.0004   | 2005-2005                           | (Reichstein et al., 2003)  |
| PT-Mi2 | La | GRA | 38.4756 | -8.0246   | 2005-2006                           | (Gilmanov et al., 2007)    |
| RU-Che | Fl | WET | 68.6130 | 161.3414  | 2002-2005                           | (Merbold et al., 2009)     |
| RU-Cok | Fl | OSH | 70.8291 | 147.4943  | 2003-2014                           | (Molen et al., 2007)       |
| RU-Fyo | Fl | ENF | 56.4615 | 32.9221   | 1998-2014                           | (Kurbatova et al., 2008)   |
| RU-Ha1 | Fl | GRA | 54.7252 | 90.0022   | 2002-2004                           | (Chevallier et al., 2006)  |
| RU-Zot | La | ENF | 60.8008 | 89.3508   | 2002-2003                           | (Tanja et al., 2003)       |
| SD-Dem | Fl | SAV | 13.2829 | 30.4783   | 2005-2005<br>2007-2009              | (Ardo et al., 2008)        |
| SE-Deg | La | WET | 64.1833 | 19.5500   | 2001-2005                           | (Chevallier et al., 2006)  |
| SE-Fla | La | ENF | 64.1128 | 19.4569   | 1996-1998<br>2001-2002              | (Tanja et al., 2003)       |
| SN-Dhr | Fl | SAV | 15.4028 | -15.4322  | 2010-2013                           | (Tagesson et al., 2014)    |
| UK-Esa | La | CRO | 55.9069 | -2.8586   | 2003-2005                           | (Groenendijk et al., 2011) |
| UK-Gri | La | ENF | 56.6072 | -3.7981   | 1997-1998<br>2000-2001<br>2005-2006 | (Arain et al., 2005)       |
| UK-Ham | La | DBF | 51.1535 | -0.8583   | 2004-2005                           | --                         |
| UK-PL3 | La | DBF | 51.4500 | -1.2667   | 2005-2006                           | --                         |
| US-AR1 | Fl | GRA | 36.4267 | -99.4200  | 2009-2012                           | (Raz-Yaseef et al., 2015b) |
| US-AR2 | Fl | GRA | 36.6358 | -99.5975  | 2009-2012                           | (Raz-Yaseef et al., 2015c) |
| US-ARb | Fl | GRA | 35.5497 | -98.0402  | 2005-2006                           | (Raz-Yaseef et al., 2015a) |
| US-ARc | Fl | GRA | 35.5465 | -98.0400  | 2005-2006                           | (Raz-Yaseef et al., 2015d) |
| US-ARM | Fl | CRO | 36.6058 | -97.4888  | 2003-2012                           | (Fischer et al., 2007)     |
| US-Aud | La | GRA | 31.5907 | -110.5104 | 2002-2006                           | (Baldocchi et al., 2015)   |

|        |    |     |         |           |                                     |                            |
|--------|----|-----|---------|-----------|-------------------------------------|----------------------------|
| US-Bar | La | DBF | 44.0646 | -71.2881  | 2005-2005                           | (Jenkins et al., 2007)     |
| US-Bkg | La | GRA | 44.3453 | -96.8362  | 2004-2006                           | (Gilmanov et al., 2005)    |
| US-Blo | Fl | ENF | 38.8953 | -120.6328 | 1997-2007                           | (Goldstein et al., 2000)   |
| US-Bo1 | La | CRO | 40.0062 | -88.2904  | 1996-2007                           | (Baldocchi et al., 2015)   |
| US-Cop | Fl | GRA | 38.0900 | -109.3900 | 2001-2003<br>2006-2007              | --                         |
| US-FPe | La | GRA | 48.3077 | -105.1019 | 2000-2006                           | (Yi et al., 2010)          |
| US-GBT | Fl | ENF | 41.3658 | -106.2397 | 1999-2006                           | (Zeller and Nikolov, 2000) |
| US-GLE | Fl | ENF | 41.3665 | -106.2399 | 2004-2014                           | (Frank et al., 2014)       |
| US-Goo | La | GRA | 34.2547 | -89.8735  | 2002-2006                           | (Yi et al., 2010)          |
| US-Ha1 | Fl | DBF | 43.5378 | -72.1715  | 1991-2012                           | (Urbanski et al., 2007)    |
| US-Ho1 | La | ENF | 45.2041 | -68.7402  | 1996-2004                           | (Hollinger et al., 2004)   |
| US-Ks2 | Fl | ENF | 28.6086 | -80.6715  | 2003-2006                           | (Powell et al., 2006)      |
| US-Los | Fl | WET | 46.0827 | -89.9792  | 2000-2008<br>2010-2010<br>2014-2014 | (Sulman et al., 2009)      |
| US-Me1 | Fl | ENF | 44.5794 | -121.5000 | 2004-2005                           | (Irvine et al., 2007)      |
| US-Me2 | Fl | ENF | 44.4523 | -121.5574 | 2002-2014                           | (Irvine et al., 2008)      |
| US-Me4 | La | ENF | 44.4992 | -121.6224 | 1996-2000                           | (Sun et al., 2004)         |
| US-Me6 | Fl | ENF | 44.3233 | -121.6078 | 2010-2014                           | (Ruehr et al., 2012)       |
| US-MMS | Fl | DBF | 39.3232 | -86.4131  | 1999-2014                           | (Schmid et al., 2000)      |
| US-MOz | La | DBF | 38.7441 | -92.2000  | 2005-2006                           | (Gu et al., 2006)          |
| US-Myb | Fl | WET | 38.0498 | -121.7651 | 2010-2014                           | (Matthes et al., 2014)     |
| US-Ne1 | Fl | CRO | 41.1651 | -96.4766  | 2001-2013                           | (Richardson et al., 2006)  |
| US-Ne2 | Fl | CRO | 41.1649 | -96.4701  | 2001-2013                           | (Richardson et al., 2006)  |
| US-Ne3 | Fl | CRO | 41.1797 | -96.4397  | 2001-2013                           | (Richardson et al., 2006)  |
| US-NR1 | Fl | ENF | 40.0329 | -105.5464 | 1998-2014                           | (Monson et al., 2002)      |
| US-Orv | Fl | WET | 40.0201 | -83.0183  | 2011-2011                           | (Morin et al., 2014)       |
| US-PFa | Fl | MF  | 45.9459 | -90.2723  | 1995-2014                           | (Davis et al., 2003)       |
| US-Prr | Fl | ENF | 65.1237 | -147.4876 | 2010-2013                           | (Nakai et al., 2013)       |
| US-Sp1 | La | ENF | 29.7381 | -82.2188  | 2005-2005                           | (Migliavacca et al., 2011) |
| US-Sp2 | La | ENF | 29.7648 | -82.2448  | 1998-2004                           | (Migliavacca et al., 2011) |
| US-Sp3 | La | ENF | 29.7548 | -82.1633  | 1999-2004                           | (Migliavacca et al., 2011) |
| US-SRG | Fl | GRA | 31.7894 | -110.8277 | 2008-2014                           | (Scott et al., 2015a)      |
| US-SRM | Fl | WSA | 31.8214 | -110.8661 | 2004-2014                           | (Scott et al., 2009)       |
| US-Syv | Fl | MF  | 46.2420 | -89.3477  | 2001-2008<br>2012-2014              | (Desai et al., 2005)       |
| US-Ton | Fl | SAV | 38.4316 | -120.9660 | 2001-2014                           | (Baldocchi et al., 2010)   |
| US-Tw1 | Fl | WET | 38.1074 | -121.6469 | 2012-2014                           | (Oikawa et al., 2017)      |
| US-Tw2 | Fl | CRO | 38.1047 | -121.6433 | 2012-2013                           | (Knox et al., 2016)        |
| US-Tw3 | Fl | CRO | 38.1159 | -121.6467 | 2013-2014                           | (Baldocchi et al., 2015)   |
| US-Tw4 | Fl | WET | 38.1030 | -121.6414 | 2013-2014                           | (Baldocchi, 2016)          |
| US-Twt | Fl | CRO | 38.1087 | -121.6530 | 2009-2014                           | (Hatala et al., 2012)      |
| US-UMB | Fl | DBF | 45.5598 | -84.7138  | 2000-2014                           | (Gough et al., 2008)       |
| US-UMd | Fl | DBG | 45.5625 | -84.6975  | 2007-2014                           | (Gough et al., 2013)       |
| US-Var | Fl | GRA | 38.4133 | -120.9507 | 2000-2014                           | (Ma et al., 2007)          |

|        |    |     |          |           |                        |                          |
|--------|----|-----|----------|-----------|------------------------|--------------------------|
| US-WCr | Fl | DBF | 45.8059  | -90.0799  | 1999-2006<br>2010-2014 | (Cook et al., 2004)      |
| US-Whs | Fl | OSH | 31.7438  | -110.0522 | 2007-2014              | (Scott et al., 2015b)    |
| US-Wi0 | Fl | ENF | 46.6188  | -91.0814  | 2002-2002              | (Noormets et al., 2007a) |
| US-Wi3 | Fl | DBF | 46.6347  | -91.0987  | 2002-2004              | (Noormets et al., 2007b) |
| US-Wi4 | Fl | ENF | 46.7393  | -91.1663  | 2002-2004              | (Noormets et al., 2007c) |
| US-Wi6 | Fl | OSH | 46.6249  | -91.2982  | 2002-2003              | (Noormets et al., 2007d) |
| US-Wi9 | Fl | ENF | 46.6188  | -91.0814  | 2004-2005              | (Noormets et al., 2007e) |
| US-Wkg | Fl | GRA | 31.7365  | -109.9419 | 2004-2014              | (Scott et al., 2010)     |
| ZA-Kru | Fl | SAV | -25.0197 | 31.4969   | 2000-2010              | (Archibald et al., 2009) |
| ZM-Mon | Fl | DBF | -15.4378 | 23.2528   | 2000-2000<br>2007-2009 | (Merbold et al., 2009)   |

---

## References

- Acosta, M., Pavelka, M., Montagnani, L., Kutsch, W., Lindroth, A., Juszczak, R. and Janouš, D.: Soil surface CO<sub>2</sub> efflux measurements in Norway spruce forests: Comparison between four different sites across Europe - from boreal to alpine forest, *Geoderma*, 192, 295–303, <https://doi.org/10.1016/j.geoderma.2012.08.027>, 2013.
- Ammann, C., Flechard, C. R., Leifeld, J., Neftel, A. and Fuhrer, J.: The carbon budget of newly established temperate grassland depends on management intensity, *Agr. Ecosyst. Environ.*, 121(1-2), 5-20, 2007.
- Anthoni, P. M., Knohl, A., Rebmann, C., Freibauer, A., Mund, M., Ziegler, W., Kolle, O. and Schulze, E. D.: Forest and agricultural land-use-dependent CO<sub>2</sub> exchange in Thuringia, Germany, *Glob. Change Biol.*, 10(12), 2005-2019, 2004.
- Arain, M. A. and Restrepo-Coupe, N.: Net ecosystem production in a temperate pine plantation in southeastern Canada, *Agric. For Meteorol.*, 128, 223–241, <https://doi.org/10.1016/j.agrformet.2004.10.003>, 2005.
- Archibald, S. A., Kirton, A., van der Merwe, M. R., Scholes, R. J., Williams, C. A. and Hanan, N.: Drivers of inter-annual variability in Net Ecosystem Exchange in a semi-arid savanna ecosystem, South Africa, *Biogeosciences*, 6, 251–266, <https://doi.org/10.5194/bg-6-251-2009>, 2009.
- Ardo, J., Molder, M., El-Tahir, B. A. and Elkhidir, H. A. M.: Seasonal variation of carbon fluxes in a sparse 103 savanna in semi arid Sudan, *Carbon Balance and Management*, 3(1), 7, <https://doi.org/10.1186/1750-0680-3-7>, 2008.
- Aubinet, M., Chermanne, B., Vandenhaute, M., Longdoz, B., Yernaux, M. and Laitat, E.: Long term carbon dioxide exchange above a mixed forest in the Belgian Ardennes, *Agr. Forest Meteorol.*, 108(4) 293-315, 2001.
- Aurela, M., Laurila, T., and Tuovinen, J. P.: Annual CO<sub>2</sub> balance of a subarctic fen in northern Europe: Importance of the winter-time efflux. *J. Geophys. Res.*, 107, 4607, <https://doi.org/10.1029/2002JD002055>, 2002.
- Aurela, M., Lohila, A., Tuovinen, J. P., Hatakka, J., Penttilä, T. and Laurila, T.: Carbon dioxide and energy flux measurements in four northern-boreal ecosystems at Pallas, *Boreal Environ. Res.*, 20, 455–473, 2015.
- Baldocchi, D.: AmeriFlux US-Tw4 Twitchell East End Wetland from 2013-Present,

<https://doi.org/10.17190/AMF/1246151>, 2016

Baldocchi, D., Chen, Q., Chen, X., Ma, S., Miller, G., Ryu, Y., Xiao, J., Wenk, R. and Battles, J.: The Dynamics of Energy, Water, and Carbon Fluxes in a Blue Oak (*Quercus douglasii*) Savanna in California, *Ecosystem Function in Savannas*, pp. 135–151, <https://doi.org/10.1201/b10275-10>, 2010.

Baldocchi, D. and Sturtevant, C.: Does day and night sampling reduce spurious correlation between canopy photosynthesis and ecosystem respiration?, *Agric. For. Meteorol.*, 207, 117–126, <https://doi.org/10.1016/j.agrformet.2015.03.010>, 2015.

Berbigier, P., Bonnefond, J. M. and Mellmann, P.: CO<sub>2</sub> and water vapour fluxes for 2 years above Euroflux forest site, *Agr. Forest Meteorol.*, 108(3), 183-197, 2001.

Beringer, J., Hutley, L. B., Hacker, J. M., Neininger, B. and U. K. T. P.: Patterns and processes of carbon, 127 water and energy cycles across northern Australian landscapes: From point to region, *Agr. Forest Meteorol.*, 151(11), 1409–1416, <https://doi.org/10.1016/j.agrformet.2011.05.003>, 2011.

Beringer, J., Hutley, L. B., Tapper, N. J., and Cernusak, L. A.: Savanna fires and their impact on net ecosystem productivity in North Australia, *Glob. Change Biol.*, 13(5), 990-1004, 2007.

Beringer, J., Livesley, S. J., Randle, J. and Hutley, L. B.: Carbon dioxide fluxes dominate the greenhouse gas exchanges of a seasonal wetland in the wet-dry tropics of Northern Australia., *Agric. For. Meteorol.*, 182–183, 239–247, <https://doi.org/10.1016/j.agrformet.2013.06.008>, 2013.

Beringer, J. et al.:An introduction to the Australian and New Zealand flux tower network - OzFlux. *Biogeosciences*, 13, 5895–5916, <https://doi.org/10.5194/bg-13-5895-2016>, 2016.

Bergeron, O., Margolis, H. A., Black, T. A., Coursolle, C., Dunn, A. L., Barr, A. G. and Wofsy, S. C.: Comparison of carbon dioxide fluxes over three boreal black spruce forests in Canada, *Glob. Change Biol.*, 13(1), 89-107, 2007.

Bonal, D. et al.: Impact of severe dry season on net ecosystem exchange in the Neotropical rainforest of French Guiana, *Glob. Chang. Biol.*, 14, 1917–1933, <https://doi.org/10.1111/j.1365-2486.2008.01610.x>, 2008.

Bristow, M., Hutley, L. B., Beringer, J., Livesley, S. J., Edwards, A. C. and Arndt, S. K.: Quantifying the relative importance of greenhouse gas emissions from current and future savanna land use change across northern Australia, *Biogeosciences Discuss.*, 1–47, <https://doi.org/10.5194/bg-2016-191>, 2016.

Carrara, A., Janssens, I. A., Yuste, J. C. and Ceulemans, R.: Seasonal changes in photosynthesis, respiration and NEE of a mixed temperate forest, *Agr. Forest Meteorol.*, 126(1-2), 15–31, <https://doi.org/10.1016/j.agrformet.2004.05.002>, 2004.

Cernusak, L. A., Hutley, L. B., Beringer, J., Holtum, J. A. M. and Turner, B. L.: Photosynthetic physiology of eucalypts along a sub-continental rainfall gradient in northern Australia, *Agric. For. Meteorol.*, 151, 1462–1470, <https://doi.org/10.1016/j.agrformet.2011.01.006>, 2011.

Cleverly, J., Eamus, D., Van Gorsel, E., Chen, C., Rumman, R., Luo, Q., Coupe, N. R., Li, L., Kljun, N., Faux, R., Yu, Q. and Huete, A.: Productivity and evapotranspiration of two contrasting semiarid ecosystems following the 2011 global carbon land sink anomaly, *Agr. Forest Meteorol.*, 220, 151–159, <https://doi.org/10.1016/j.agrformet.2016.01.086>, 2016.

Cleverly, J. et al.: Dynamics of component carbon fluxes in a semi-arid Acacia woodland, central Australia, *J. Geophys. Res-Biogeophys.*, 118, 1168–1185, <https://doi.org/10.1002/jgrg.20101>, 2013.

Chen, S. P., Chen, J. Q., Lin, G. H., Zhang, W. L., Miao, H. X., Wei, L., Huang, J. H. and Han, X.G.: Energy balance and partition in Inner Mongolia steppe ecosystems with different land use types, *Agr. Forest Meteorol.*, 149(11), 1800-1809, 2009.

Chen, B., Ge, Q., Fu, D., Yu, G., Sun, X., Wang, S. and Wang, H.: A data-model fusion approach for upscaling gross ecosystem productivity to the landscape scale based on remote sensing and flux footprint modelling, *Biogeosciences*, 7(9), 2943-2958, 2010.

Chevallier, F., Viovy, N., Reichstein, M. and Ciais P.: On the assignment of prior errors in Bayesian inversions of CO<sub>2</sub> surface fluxes, *Geophys. Res. Lett.*, 33(13), 2006.

Chiesi, M., Maselli, F., Bindi, M., Fibbi, L., Cherubini, P., Arlotta, E., Tirone, G., Matteucci, G. and Seufert, G.: Modelling carbon budget of Mediterranean forests using ground and remote sensing measurements. *Agric. For. Meteorol.*, 135, 22–34, <https://doi.org/10.1016/j.agrformet.2005.09.011>, 2015.

Chojnicki, B. H., Ukbaniak, M., Jozefczyk, D., Augustin, J. and Olejnik, J.: Measurements of gas and heat fluxes at Rzecin wetland. *Proc. Monogr. Eng. Wate.*, 125-132, 2007.

Cook, B. D. et al.: Carbon exchange and venting anomalies in an upland deciduous forest in northern Wisconsin, USA, *Agric. For. Meteorol.*, 126, 271–295, <https://doi.org/10.1016/j.agrformet.2004.06.008>,

2004.

Davis, K. J., Bakwin, P. S., Yi, C. X., Berger, B. W., Zhao, C.L., Teclaw, R. M. and Isebrands, J. G.: The annual cycles of CO<sub>2</sub> and H<sub>2</sub>O exchange over a northern mixed forest as observed from a very tall tower, *Glob. Change Biol.*, 9(9), 1278-1293, 2003.

Delpierre, N., Berveiller, D., Granda, E. and Dufrêne, E.: Wood phenology, not carbon input, controls the interannual variability of wood growth in a temperate oak forest, *New Phytol.*, 210(2), 459-470, 2016.

Desai, A. R., Bolstad, P. V., Cook, B. D., Davis, K. J. and Carey, E. V.: Comparing net ecosystem exchange of carbon dioxide between an old-growth and mature forest in the upper Midwest, USA, *Agric. For. Meteorol.*, 128, 33–55, <https://doi.org/10.1016/j.agrformet.2004.09.005>, 2005.

Dietiker, D., Buchmann, N. and Eugster W.: Testing the ability of the DNDC model to predict CO<sub>2</sub> and water vapour fluxes of a Swiss cropland site, *Agric. Ecosyst. Environ.*, 139, 396–401, <https://doi.org/10.1016/j.agee.2010.09.002>, 2010

Don, A., Rebmann, C., Kolle, O., Scherer-Lorenzen, M. and Schulze, E. D.: Impact of afforestation-associated management changes on the carbon balance of grassland, *Glob. Change Biol.*, 15(8), 1990-2002, 2009.

Dunn, A. L., Barford, C. C., Wofsy, S. C., Goulden, M. L. and Daube, B. C.: A long-term record of carbon exchange in a boreal black spruce forest: means, responses to interannual variability, and decadal trends, *Glob. Change Biol.*, 13(3), 577-590, 2007.

Dušek, J., Čížková, H., Stellner, S., Czerný, R. and Květ, J.: Fluctuating water table affects gross ecosystem production and gross radiation use efficiency in a sedge-grass marsh, *Hydrobiologia*, 692, 57–66, <https://doi.org/10.1007/s10750-012-0998-z>, 2012.

Etzold, S., Ruehr, N. K., Zweifel, R., Dobbertin, M., Zingg, A., Pluess, P., Häsler, R., Eugster, W. and Buchmann, N.: The Carbon Balance of Two Contrasting Mountain Forest Ecosystems in Switzerland: Similar Annual Trends, but Seasonal Differences, *Ecosystems*, 14, 1289–1309, <https://doi.org/10.1007/s10021-011-9481-3>, 2011.

Fares, S., Savi, F., Muller, J., Matteucci, G. and Paoletti, E.: Simultaneous measurements of above and below canopy ozone fluxes help partitioning ozone deposition between its various sinks in a Mediterranean Oak Forest, *Agric. For. Meteorol.*, 198, 181–191, <https://doi.org/10.1016/j.agrformet.2014.08.014>, 2014.

Ferréa, C., Zenone, T., Comolli, R. and Seufert, G.: Estimating heterotrophic and autotrophic soil respiration in a semi-natural forest of Lombardy, Italy, *Pedobiologia*, 55(6), 285–294, doi:10.1016/j.pedobi.2012.05.001, 2012.

Fischer, M. L., Billesbach, D. P., Berry, J. A., Riley, W. J. and Torn, M. S.: Spatiotemporal variations in growing season exchanges of CO<sub>2</sub>, H<sub>2</sub>O, and sensible heat in agricultural fields of the Southern Great Plains, *Earth Interact.*, 11, 1–21, <https://doi.org/10.1175/EI231.1>, 2007.

Frank, J. M., Massman, W. J., Ewers, B. E., Huckaby, L. S. and Negrón, J. F.: Ecosystem CO<sub>2</sub>/H<sub>2</sub>O fluxes are explained by hydraulically limited gas exchange during tree mortality from spruce bark beetles, *J. Geophys. Res. Biogeosciences*, 119, 1195–1215, <https://doi.org/10.1002/2013JG002597>, 2014.

Galvagno, M. et al.: Phenology and carbon dioxide source/sink strength of a subalpine grassland in response to an exceptionally short snow season, *Environ. Res. Lett.*, 8, 25008, <https://doi.org/10.1088/1748-9326/8/2/025008>, 2013.

Garbulsky, M. F., Penuelas, J., Papale, D. and Filella, I.: Remote estimation of carbon dioxide uptake by a Mediterranean forest, *Glob. Change Biol.*, 14(12), 2860–2867, 2008.

Giasson, M. A., Coursolle, C. and Margolis, H. A.: Ecosystem-level CO<sub>2</sub> fluxes from a boreal cutover in eastern Canada before and after scarification, *Agr. Forest Meteorol.*, 140(1–4), 23–40, 2006.

Gilmanov, T. G., Soussana, J. E., Aires, L., Allard, V., Ammann, C., Balzarolo, M., Barcza, Z., Bernhofer, C., Campbell, C. L., Cernusca, A., Cescatti, A., Clifton-Brown, J., Dirks, B. O. M., Dore, S., Eugster, W., Fuhrer, J., Gimeno, C., Gruenwald, T., Haszpra, L., Hensen, A., Ibrom, A., Jacobs, A. F. G., Jones, M. B., Lanigan, G., Laurila, T., Lohila, A., Manca, G., Marcolla, B., Nagy, Z., Pilegaard, K., Pinter, K., Pio, C., Raschi, A., Rogiers, N., Sanz, M. J., Stefani, P., Sutton, M., Tuba, Z., Valentini, R., Williams, M. L., and Wohlfahrt, G.: Partitioning European grassland net ecosystem CO<sub>2</sub> exchange into gross primary productivity and ecosystem respiration using light response function analysis, *Agr. Ecosyst. Environ.*, 121(1–2), 93–120, 2007.

Gilmanov, T. G., Tieszen, L. L., Wylie, B. K., Flanagan, L. B., Frank, A. B., Haferkamp, M. R., Meyers, T. P. and Morgan, J. A.: Integration of CO<sub>2</sub> flux and remotely-sensed data for primary production and ecosystem respiration analyses in the Northern Great Plains: potential for quantitative spatial extrapolation, *Global Ecol. Biogeogr.*, 14(3), 271–292, 2005.

Goldstein, A. H., Hultman, N. E., Fracheboud, J. M., Bauer, M. R., Panek, J. A., Xu, M., Qi, Y., Guenther, A. B. and Baugh, W.: Effects of climate variability on the carbon dioxide, water, and sensible heat fluxes above a ponderosa pine plantation in the Sierra Nevada (CA), *Agr. Forest Meteorol.*, 101(2-3), 113-129, 2000.

Gough, C. M., Hardiman, B. S., Nave, L. E., Bohrer, G., Maurer, K. D., Vogel, C. S., Nadelhoffer, K. J. and Curtis, P. S.: 2013 Sustained carbon uptake and storage following moderate disturbance in a Great Lakes forest, *Ecol. Appl.*, 23, 1202–1215, <https://doi.org/10.1890/12-1554.1>, 2013.

Gough, C. M., Vogel, C. S., Schmid, H. P., Su, H. B. and Curtis, P. S.: Multi-year convergence of biometric and meteorological estimates of forest carbon storage, *Agr. Forest Meteorol.*, 148(2), 158-170, 2008.

Goulden, M. L., Miller, S. D. and da Rocha, H. R.: 2006. Nocturnal cold air drainage and pooling in a tropical forest, *J. Geophys. Res-Atmos.*, 111(D8), <https://doi.org/10.1029/2005jd006037>, 2006.

Granier, A., Ceschia, E., Damesin, C., Dufrene, E., Epron, D., Gross, P., Lebaube, S., Le Dantec, V., Le Goff, N., Lemoine, D., Lucot, E., Ottorini, J. M., Pontailler, J. Y. and Saugier, B.: The carbon balance of a young Beech forest, *Funct. Ecol.*, 14(3), 312-325, 2000.

Groenendijk, M., Dolman, A. J., van der Molen, M. K., Leuning, R., Arneth, A., Delpierre, N., Gash, J. H., Lindroth, A., Richardson, A. D., Verbeeck, H. and Wohlfahrt, G.: Assessing parameter variability in a photosynthesis model within and between plant functional types using global fluxnet eddy covariance data, *Agr. Forest Meteorol.*, 151: 22-38, 2011.

Grünwald, T. and Bernhofer, C.: A decade of carbon, water and energy flux measurements of an old spruce forest at the Anchor Station Tharandt, *Tellus, Ser. B Chem. Phys. Meteorol.*, 59, 387–396, <https://doi.org/10.1111/j.1600-0889.2007.00259.x>, 2007

Gu, Y., Liou, K. N., Xue, Y., Mechoso, C. R., Li, W. and Luo, Y.: Climatic effects of different aerosol types in China simulated by the UCLA general circulation model, *J. Geophys. Res-Atmos.*, 111(D15), <https://doi.org/10.1029/2005jd006312>, 2006.

Guan, D. X., Wu, J. B., Zhao, X. S., Han, S. J., Yu, G. R., Sun, X. M. and Jin, C.J.: CO<sub>2</sub> fluxes over an old, temperate mixed forest in northeastern China, *Agr. Forest Meteorol.*, 137(3-4), 138-149, 2006.

Hatala, J. A., Detto, M., Sonnentag, O., Deverel, S. J., Verfaillie, J., Baldocchi, D. D.: Greenhouse gas (CO<sub>2</sub>, CH<sub>4</sub>, H<sub>2</sub>O) fluxes from drained and flooded agricultural peatlands in the Sacramento-San Joaquin

Delta, *Agric. Ecosyst. Environ.*, 150, 1–18, <https://doi.org/10.1016/j.agee.2012.01.009>, 2012.

Hinko-Najera, N., Isaac, P., Beringer, J., Gorsel, E. van, Ewenz, C., McHugh, I., Exbrayat, J. F., Livesley, S. J. and Arndt, S. K.: Net ecosystem carbon exchange of a dry temperate eucalypt forest, *Biogeosciences*, 14, 3781–3800, <https://doi.org/10.5194/bg-14-3781-2017>, 2017.

Hirano, T., Segah, H., Harada, T., Limin, S., June, T., Hirata, R. and Osaki, M.: Carbon dioxide balance of a tropical peat swamp forest in Kalimantan, Indonesia, *Glob. Change Biol.*, 13(2), 412–425, 2007.

Hollinger, D. Y., Aber, J., Dail, B., Davidson, E. A., Goltz, S. M., Hughes, H., Leclerc, M. Y., Lee, J. T., Richardson, A. D., Rodrigues, C., Scott, N. A., Achuatavari, D. and Walsh, J.: Spatial and temporal variability in forest-atmosphere CO<sub>2</sub> exchange, *Glob. Change Biol.*, 10(10), 1689–1706, 2004.

Hommeltenberg, J., Schmid, H. P., Drösler, M. and Werle, P.: Can a bog drained for forestry be a stronger carbon sink than a natural bog forest?, *Biogeosciences*, 11, 3477–3493, <https://doi.org/10.5194/bg-11-3477-2014>, 2014.

Hoshika, Y., Fares, S., Savi, F., Gruening, C., Goded, I., De Marco, A., Sicard, P. and Paoletti E.: Stomatal conductance models for ozone risk assessment at canopy level in two Mediterranean evergreen forests, *Agric. For. Meteorol.*, 234, 212–221, <https://doi.org/10.1016/j.agrformet.2017.01.005>, 2017.

Hutley, L. B., Beringer, J., Isaac, P. R., Hacker, J. M. and Cernusak, L. A.: A sub-continental scale living laboratory: Spatial patterns of savanna vegetation over a rainfall gradient in northern Australia, *Agric. For. Meteorol.*, 151, 1417–1428, <https://doi.org/10.1016/j.agrformet.2011.03.002>, 2011.

Imer, D., Merbold, L., Eugster, W. and Buchmann, N.: Temporal and spatial variations of soil CO<sub>2</sub>, CH<sub>4</sub> and N<sub>2</sub>O fluxes at three differently managed grasslands, *Biogeosciences*, 10, 5931–5945, <https://doi.org/10.5194/bg-10-5931-2013>, 2013.

Irvine, J., Law, B. E., Hibbard, K. A.: Postfire carbon pools and fluxes in semiarid ponderosa pine in Central Oregon, *Glob. Chang. Biol.*, 13, 1748–1760, <https://doi.org/10.1111/j.1365-2486.2007.01368.x>, 2007.

Irvine, J., Law, B. E., Martin, J. G. and Vickers, D.: Interannual variation in soil CO<sub>2</sub> efflux and the response of root respiration to climate and canopy gas exchange in mature ponderosa pine, *Glob. Chang. Biol.*, 14, 2848–2859, [doi:10.1111/j.1365-2486.2008.01682.x](https://doi.org/10.1111/j.1365-2486.2008.01682.x), 2008.

Jacobs, C. M. J. et al.: Variability of annual CO<sub>2</sub> exchange from Dutch grasslands. *Biogeosciences*, 4, 803–816, <https://doi.org/10.5194/bg-4-803-2007>, 2007.

Jaksic, V., Kiely, G., Albertson, J., Oren, R., Katul, G., Leahy, P. and Byrne, K. A.: Net ecosystem exchange of grassland in contrasting wet and dry years, *Agr. Forest Meteorol.*, 139(3-4), 323-334, 2006.

Jenkins, J. P., Richardson, A. D., Braswell, B. H., Ollinger, S. V., Hollinger, D. Y. and Smith, M. L.: Refining light-use efficiency calculations for a deciduous forest canopy using simultaneous tower-based carbon flux and radiometric measurements, *Agr. Forest Meteorol.*, 143(1-2), 64-79, 2007.

Kato, T., Tang, Y., Gu, S., Hirota, M., Du, M., Li, Y. and Zhao X. Temperature and biomass influences on interannual changes in CO<sub>2</sub> exchange in an alpine meadow on the Qinghai-Tibetan Plateau, *Glob. Chang. Biol.*, 12, 1285–1298, <https://doi.org/10.1111/j.1365-2486.2006.01153.x>, 2006.

Kilinc, M., Beringer, J., Hutley, L. B., Tapper, N. J. and McGuire, D. A.: Carbon and water exchange of the world's tallest angiosperm forest, *Agric. For. Meteorol.*, 182–183, 215–224, <https://doi.org/10.1016/j.agrformet.2013.07.003>, 2013.

Knohl, A., Schulze, E. D., Kolle, O. and Buchmann, N.: Large carbon uptake by an unmanaged 250-year-old deciduous forest in Central Germany, *Agr. Forest Meteorol.*, 118(3-4), 151-167, 2003.

Knox, S. H., Matthes, J. H., Sturtevant, C., Oikawa, P. Y., Verfaillie, J. and Baldocchi, D.: Biophysical controls on interannual variability in ecosystem-scale CO<sub>2</sub> and CH<sub>4</sub> exchange in a California rice paddy, *J. Geophys. Res., Biogeosciences*, 121, 978–1001, <https://doi.org/10.1002/2015JG003247>, 2016.

Kurbatova, J., Li, C., Varlagin, A., Xiao, X. and Vygodskaya, N.: Modeling carbon dynamics in two adjacent spruce forests with different soil conditions in Russia, *Biogeosciences*, 5, 969–980, <https://doi.org/10.5194/bg-5-969-2008>, 2008.

Lafleur, P. M., Roulet, N. T., Bubier, J. L., Frolking, S. and Moore, T. R.: Interannual variability in the peatland-atmosphere carbon dioxide exchange at an ombrotrophic bog, *Global Biogeochem. Cy.*, 17(2), <https://doi.org/10.1029/2002gb001983>, 2003.

Lindauer, M., Schmid, H. P., Grote, R., Mauder, M., Steinbrecher, R. and Wolpert, B.: Net ecosystem exchange over a non-cleared wind-throw-disturbed upland spruce forest-Measurements and simulations, *Agric. For. Meteorol.*, 197, 219–234, <https://doi.org/10.1016/j.agrformet.2014.07.005>, 2014.

Lohila, A., Aurela, M., Tuovinen, J. P. and Laurila, T.: Annual CO<sub>2</sub> exchange of a peat field growing spring barley or perennial forage grass, *J. Geophys. Res-Atmos.*, 109, <https://doi.org/10.1029/2004JD004715>, 2004.

Loubet, B. et al.: Carbon, nitrogen and Greenhouse gases budgets over a four years crop rotation in northern France, *Plant Soil*, 343, 109–137, <https://doi.org/10.1007/s11104-011-0751-9>, 2011.

Lund, M., Falk, J. M., Friberg, T., Mbufong, H. N., Sigsgaard, C., Soegaard, H. and Tamstorf, M. P.: Trends in CO<sub>2</sub> exchange in a high Arctic tundra heath, 2000-2010, *J. Geophys. Res. Biogeosciences*, 117, <https://doi.org/10.1029/2011JG001901>, 2012.

Ma, S., Baldocchi, D. D., Xu, L. and Hehn, T.: Inter-annual variability in carbon dioxide exchange of an oak/grass savanna and open grassland in California, *Agric. For. Meteorol.*, 147, 157–171, <https://doi.org/10.1016/j.agrformet.2007.07.008>, 2007.

Matsumoto, K. et al.: Energy consumption and evapotranspiration at several boreal and temperate forests in the Far East, *Agric. For. Meteorol.*, 148, 1978–1989, <https://doi.org/10.1016/j.agrformet.2008.09.008>, 2008.

Matthes, J. H., Sturtevant, C., Verfaillie, J., Knox, S. and Baldocchi, D.: Parsing the variability in CH<sub>4</sub> flux at a spatially heterogeneous wetland: Integrating multiple eddy covariance towers with high-resolution flux footprint analysis, *J. Geophys. Res. Biogeosciences*, 119, 1322–1339, <https://doi.org/10.1002/2014JG002642>, 2014.

Mkhabela, M. S. et al.: Comparison of carbon dynamics and water use efficiency following fire and harvesting in Canadian boreal forests, *Agric. For. Meteorol.*, 149, 783–794, <https://doi.org/10.1016/j.agrformet.2008.10.025>, 2009.

Marcolla, B., Pitacco, A. and Cescatti, A.: Canopy architecture and turbulence structure in a coniferous forest. *Bound-Lay. Meteorol.* 108, 39–59, <https://doi.org/10.1023/A:1023027709805>, 2003.

Mauder, M., Cuntz, M., Drüe, C., Graf, A., Rebmann, C., Schmid, H. P., Schmidt, M and Steinbrecher, R.: A strategy for quality and uncertainty assessment of long-term eddy-covariance measurements, *Agric. For. Meteorol.*, 169, 122–135, <https://doi.org/10.1016/j.agrformet.2012.09.006>, 2013.

Merbold, L., Eugster, W., Stieger, J., Zahniser, M., Nelson, D. and Buchmann, N.: Greenhouse gas budget

(CO<sub>2</sub>, CH<sub>4</sub> and N<sub>2</sub>O) of intensively managed grassland following restoration, *Glob. Chang. Biol.*, 20, 1913–1928, <https://doi.org/10.1111/gcb.12518>, 2014.

Merbold, L., Kutsch, W. L., Corradi, C., Kolle, O., Rebmann, C., Stoy, P. C., Zimov, S. A. and Schulze, E. D.: Artificial drainage and associated carbon fluxes (CO<sub>2</sub>/CH<sub>4</sub>) in a tundra ecosystem, *Glob. Chang. Biol.*, 15, 2599–2614, <https://doi.org/10.1111/j.1365-2486.2009.01962.x>, 2009.

Merbold, L. et al.: Precipitation as driver of carbon fluxes in 11 African ecosystems, *Biogeosciences*, 6, 1027–1041, <https://doi.org/10.5194/bg-6-1027-2009>, 2009.

Meyer, W. S., Kondrlovà, E. and Koerber, G. R.: Evaporation of perennial semi-arid woodland in southeastern Australia is adapted for irregular but common dry periods, *Hydrol. Process.*, 29, 3714–3726, <https://doi.org/10.1002/hyp.10467>, 2015.

McHugh, I. D., Beringer, J., Cunningham, S. C., Baker, P. J., Cavagnaro, T. R., MacNally, R. and Thompson, R. M.: Interactions between nocturnal turbulent flux, storage and advection at an ‘ideal’ eucalypt woodland site, *Biogeosciences*, 14, 3027–3050, <https://doi.org/10.5194/bg-14-3027-2017>, 2017.

Migliavacca, M., Meroni, M., Busetto, L., Colombo, R., Zenone, T., Matteucci, G., Manca, G. and Seufert, G.: Modeling gross primary production of agro-forestry ecosystems by assimilation of satellite-derived information in a process-based model, *Sensors* 9, 922–942, <https://doi.org/10.3390/s90200922>, 2009.

Migliavacca, M., Reichstein, M., Richardson, A. D., Colombo, R., Sutton, M. A., Lasslop, G., Tomelleri, E., Wohlfahrt, G., Carvalhais, N., Cescatti, A., Mahecha, M. D., Montagnani, L., Papale, D., Zaehle, S., Arain, A., Arneth, A., Black, T. A., Carrara, A., Dore, S., Gianelle, D., Helfter, C., Hollinger, D., Kutsch, W. L., Lafleur, P. M., Nouvellon, Y., Rebmann, C., da Rocha, H. R., Rodeghiero, M., Rouspard, O., Sebastia, M. T., Seufert, G., Soussana, J. F., van der Molen, M. K.: Semiempirical modeling of abiotic and biotic factors controlling ecosystem respiration across eddy covariance sites, *Glob. Change Biol.*, 17(1), 390–409, 2011.

Monson, R. K., Turnipseed, A. A., Sparks, J. P., Harley, P. C., Scott-Denton, L. E., Sparks, K. and Huxman, T. E.: Carbon sequestration in a high-elevation, subalpine forest, *Glob. Chang. Biol.*, 8, 459–478, <https://doi.org/10.1046/j.1365-2486.2002.00480.x>, 2002.

Montagnani, L. et al.: A new mass conservation approach to the study of CO<sub>2</sub> advection in an alpine forest, *J. Geophys. Res. Atmos.*, 114, <https://doi.org/10.1029/2008JD010650>, 2009.

Moors, E. J.: Water Use of Forests in The Netherlands, Vrije Universiteit Amsterdam, 2012.

Morin, T. H., Bohrer, G., Frasson, R. P. D. M., Naor-Azreli, L., Mesi, S., Stefanik, K. C. and Schäfer, K. V. R.: Environmental drivers of methane fluxes from an urban temperate wetland park, *J. Geophys. Res.-Biogeo.*, 119, 2188–2208, <https://doi.org/10.1002/2014JG002750>, 2014.

Moureaux, C., Debacq, A., Bodson, B., Heinesch, B. and Aubinet, M.: Annual net ecosystem carbon exchange by a sugar beet crop, *Agr. Forest Meteorol.*, 139(1-2), 25-39, 2006.

Nakai, T., Kim, Y., Busey, R. C., Suzuki, R., Nagai, S., Kobayashi, H., Park, H., Sugiura, K. and Ito, A.: Characteristics of evapotranspiration from a permafrost black spruce forest in interior Alaska, *Polar Sci.*, 7, 136–148. <https://doi.org/10.1016/j.polar.2013.03.003>, 2013.

Noormets, A., Chen, J. and Crow, T. R. Age-dependent changes in ecosystem carbon fluxes in managed forests in northern Wisconsin, USA, *Ecosystems*, 10, 187–203, <https://doi.org/10.1007/s10021-007-9018-y>, 2007.

Oikawa, P. Y., Jenerette, G. D., Knox, S. H., Sturtevant, C., Verfaillie, J., Dronova, I., Poindexter, C. M., Eichelmann, E. and Baldocchi, D. D.: Evaluation of a hierarchy of models reveals importance of substrate limitation for predicting carbon dioxide and methane exchange in restored wetlands, *J. Geophys. Res.-Biogeo.*, 122, 145–167, <https://doi.org/10.1002/2016JG003438>, 2017.

Pilegaard, K., Mikkelsen, T. N., Beier, C., Jensen, N. O., Ambus, P. and Ro-Poulsen, H.: Field measurements of atmosphere-biosphere interactions in a Danish beech forest, *Boreal Environ. Res.*, 8(4): 315-333, 2003.

Pinter, K., Barcza, Z., Balogh, J., Czobel, S., Csintalan, Z., Tuba, Z. and Nagy, Z.: Interannual variability of grasslands' carbon balance depends on soil type, *Community Ecol.*, 9, 43-48, 2008.

Posse, G., Lewczuk, N., Richter, K. and Cristiano, P.: Carbon and water vapor balance in a subtropical pine plantation, *IForest*, 9, 736–742, <https://doi.org/10.3832/ifor1815-009>, 2016.

Post, H., Hendricks Franssen, H. J., Graf, A., Schmidt, M. and Vereecken, H.: Uncertainty analysis of eddy covariance CO<sub>2</sub> flux measurements for different EC tower distances using an extended two-tower approach, *Biogeosciences*, 12, 1205–1221, <https://doi.org/10.5194/bg-12-1205-2015>, 2015.

Powell, T. L., Bracho, R., Li, J., Dore, S., Hinkle, C. R. and Drake, B. G.: Environmental controls over net

ecosystem carbon exchange of scrub oak in central Florida, *Agric. For. Meteorol.*, 141, 19–34, <https://doi.org/10.1016/j.agrformet.2006.09.002>, 2006.

Prescher, A. K., Grünwald, T. and Bernhofer, C.: Land use regulates carbon budgets in eastern Germany: From NEE to NBP, *Agric. For. Meteorol.*, 150, 1016–1025, <https://doi.org/10.1016/j.agrformet.2010.03.008>, 2010.

Prober, S. M., Thiele, K. R., Rundel, P. W., Yates, C. J., Berry, S. L., Byrne, M., Christidis, L., Gosper, C. R., Grierson, P. F., Lemson, K. and Lyons, T.: Facilitating adaptation of biodiversity to climate change: a conceptual framework applied to the world's largest Mediterranean-climate woodland, *Climatic Change*, 110(1-2), 227-48, 2012

Rambal, S., Joffre, R., Ourcival, J. M., Cavender-Bares, J. and Rocheteau, A.: The growth respiration component in eddy CO<sub>2</sub> flux from a *Quercus ilex* mediterranean forest, *Glob. Change Biol.*, 10(9), 1460-1469, 2004.

Raz-Yaseef, N., Billesbach, D. P., Fischer, M. L., Biraud, S. C., Gunter, S. A., Bradford, J. A. and Torn, M. S.: Vulnerability of crops and native grasses to summer drying in the U.S. Southern Great Plains, *Agric. Ecosyst. Environ.*, 213, 209–218, <https://doi.org/10.1016/j.agee.2015.07.021>, 2015.

Rebmann, C., Zeri, M., Lasslop, G., Mund, M., Kolle, O., Schulze, E. D. and Feigenwinter, C. Treatment and assessment of the CO<sub>2</sub>-exchange at a complex forest site in Thuringia, Germany. *Agr. Forest Meteorol.*, 150(5): 684-691, 2010.

Reichstein, M., Falge, E., Baldocchi, D., Papale, D., Aubinet, M., Berbigier, P., Bernhofer, C., Buchmann, N., Gilmanov, T., Granier, A., Grunwald, T., Havrankova, K., Ilvesniemi, H., Janous, D., Knohl, A., Laurila, T., Lohila, A., Loustau, D., Matteucci, G., Meyers, T., Miglietta, F., Ourcival, J. M., Pumpanen, J., Rambal, S., Rotenberg, E., Sanz, M., Tenhunen, J., Seufert, G., Vaccari, F., Vesala, T., Yakir, D. and Valentini, R.: On the separation of net ecosystem exchange into assimilation and ecosystem respiration: review and improved algorithm, *Glob. Change Biol.*, 11(9), 1424-1439, 2005.

Reichstein, M., Rey, A., Freibauer, A., Tenhunen, J., Valentini, R., Banza, J., Casals, P., Cheng, Y. F., Grunzweig, J. M., Irvine, J., Joffre, R., Law, B. E., Loustau, D., Miglietta, F., Oechel, W., Ourcival, J. M., Pereira, J. S., Peressotti, A., Ponti, F., Qi, Y., Rambal, S., Rayment, M., Romanya, J., Rossi, F., Tedeschi, V., Tirone, G., Xu, M. and Yakir, D.: Modeling temporal and large-scale spatial variability of soil respiration from soil water availability, temperature and vegetation productivity indices, *Global Biogeochem. Cy.*, 17(4), <https://doi.org/10.1029/2003gb002035>, 2003.

Reverter, B. R., Sánchez-Cañete, E. P., Resco, V., Serrano-Ortiz, P., Oyonarte, C. and Kowalski, A. S.: Analyzing the major drivers of NEE in a Mediterranean alpine shrubland, *Biogeosciences*, 7, 2601–2611, <https://doi.org/10.5194/bg-7-2601-2010>, 2010.

Rey, A., Pegoraro, E., Tedeschi, V., De Parri, I., Jarvis, P. G. and Valentini, R.: Annual variation in soil respiration and its components in a coppice oak forest in Central Italy, *Glob. Chang. Biol.*, 8, 851–866, <https://doi.org/10.1046/j.1365-2486.2002.00521.x>, 2002.

Richardson, A. D., Hollinger, D. Y., Burba, G. G., Davis, K. J., Flanagan, L. B., Katul, G. G., Munger, J. W., Ricciuto, D. M., Stoy, P. C., Suyker, A. E., Verma, S. B. and Wofsy, S. C.: A multi-site analysis of random error in tower-based measurements of carbon and energy fluxes, *Agr. Forest Meteorol.*, 136(1-2), 1-18, 2006.

Ruehr, N. K., Martin, J. G. and Law, B. E.: Effects of water availability on carbon and water exchange in a young ponderosa pine forest: Above- and belowground responses, *Agric. For. Meteorol.*, 164, 136–148, <https://doi.org/10.1016/j.agrformet.2012.05.015>, 2012.

Sabbatini, S. et al.: Greenhouse gas balance of cropland conversion to bioenergy poplar short-rotation coppice, *Biogeosciences*, 13, 95–113, <https://doi.org/10.5194/bg-13-95-2016>, 2016.

Schmid, H. P., Grimmer, C. S. B., Cropley, F., Offerle, B. and Su, H. B.: Measurements of CO<sub>2</sub> and energy fluxes over a mixed hardwood forest in the mid-western United States, *Agr. Forest Meteorol.*, 103(4), 357-374, 2000.

Schmidt, M., Reichenau, T. G., Fiener, P. and Schneider K.: The carbon budget of a winter wheat field: An eddy covariance analysis of seasonal and inter-annual variability, *Agric. For. Meteorol.*, 165, 114–126, <https://doi.org/10.1016/j.agrformet.2012.05.012>, 2012.

Schroder, I., Kuske, T., Zegelin and S.: Eddy Covariance Dataset for Arcturus (2011-2013), Geoscience Australia, Canberra. <https://doi.org/10.1002/100/14249>, 2014.

Scott, R. L., Biederman, J. A., Hamerlynck, E. P. and Barron-Gafford, G. A.: The carbon balance pivot point of southwestern U.S. semiarid ecosystems: Insights from the 21st century drought, *J. Geophys. Res. Biogeosciences*, 120, 2612–2624, <https://doi.org/10.1002/2015JG003181>, 2015.

Scott, R. L., Hamerlynck, E. P., Jenerette, G. D., Moran, M. S. and Barron-Gafford, G. A.: Carbon dioxide

exchange in a semidesert grassland through drought-induced vegetation change, *J. Geophys. Res-Bioge.*, 115, <https://doi.org/10.1029/2010JG001348>, 2010.

Scott, R. L., Jenerette, G. D., Potts, D. L. and Huxman, T. E.: Effects of seasonal drought on net carbon dioxide exchange from a woody-plant-encroached semiarid grassland, *J. Geophys. Res-Bioge.*, 114, <https://doi.org/10.1029/2008JG000900>, 2009.

Serrano-Ortiz, P., Marañón-Jiménez, S., Reverter, B. R., Sánchez-Cañete, E. P., Castro, J., Zamora, R. and Kowalski, A. S.: Post-fire salvage logging reduces carbon sequestration in Mediterranean coniferous forest, *Forest Ecol. Manag.*, 262(12), 2287–2296, <https://doi.org/10.1016/j.foreco.2011.08.023>, 2011.

Shi, P., Sun, X., Xu, L., Zhang, X., He, Y., Zhang, D. and Yu, G.: Net ecosystem CO<sub>2</sub> exchange and controlling factors in a steppe—Kobresia meadow on the Tibetan Plateau, *Sci. China Ser. D Earth Sci.*, 49, 207–218, <https://doi.org/10.1007/s11430-006-8207-4>, 2006.

Shao, C., Chen, J., Li, L., Dong, G., Han, J., Abraha, M. and John, R.: Grazing effects on surface energy fluxes 500 in a desert steppe on the Mongolian Plateau. *Ecol. Appl.*, 27(2), 485–502, <https://doi.org/10.1002/eap.1459>, 501, 2017.

Stevens, R. M., Ewenz, C. M., Grigson, G. and Conner, S. M.: Water use by an irrigated almond orchard, *Irrigation Sci.*, 30(3), 189–200, <https://doi.org/10.1007/s00271-011-0270-8>, 2011.

Stiegler, C., Lund, M., Røjle Christensen, T., Mastepanov, M. and Lindroth, A.: Two years with extreme and little snowfall: Effects on energy partitioning and surface energy exchange in a high-Arctic tundra ecosystem, *Cryosphere*, 10, 1395–1413, <https://doi.org/10.5194/tc-10-1395-2016>, 2016.

Sulman, B. N., Desai, A. R., Cook, B. D., Saliendra, N. and MacKay, D. S.: Contrasting carbon dioxide fluxes between a drying shrub wetland in Northern Wisconsin, USA, and nearby forests, *Biogeosciences*, 6, 1115–1126, <https://doi.org/10.5194/bg-6-1115-2009>, 2009.

Sun, O. J., Campbell J, Law, B. E. and Wolf, V.: Dynamics of carbon stocks in soils and detritus across chronosequences of different forest types in the Pacific Northwest, USA, *Glob. Change Biol.*, 10(9), 1470–1481, 2004.

Suni, T., Rinne, J., Reissell, A., Altimir, N., Keronen, P., Rannik, U., Dal Maso, M., Kulmala, M. and Vesala, T.: Long-term measurements of surface fluxes above a Scots pine forest in Hyytiala, southern Finland, 1996–2001, *Boreal Environ. Res.*, 8(4), 287–301, 2003.

Tagesson, T., Fensholt, R., Guiro, I., Rasmussen, M. O., Huber, S., Mbow, C., Garcia, M., Horion, S., Sandholt, I., Holm-Rasmussen, B., Götsche, F. M., Ridler, M.-E., Olén, N., Olsen, J. L., Ehammer, A., Madsen, M., Olesen, F. S. and Ardö, J.: Ecosystem properties of semiarid savanna grassland in West Africa and its relationship with environmental variability, *Glob. Change Biol.*, 21(1), 250–264, <https://doi.org/10.1111/gcb.12734>, 2014.

Tanja, S., Berninger, F., Vesala, T., Markkanen, T., Hari, P., Makela, A., Ilvesniemi, H., Hanninen, H., Nikinmaa, E., Huttula, T., Laurila, T., Aurela, M., Grelle, A., Lindroth, A., Arneth, A., Shibistova, O. and Lloyd, J.: Air temperature triggers the recovery of evergreen boreal forest photosynthesis in spring, *Glob. Change Biol.*, 9(10), 1410-1426, 2003.

Tedeschi, V., Rey, A., Manca, G., Valentini, R., Jarvis, P. J. and Borghetti, M.: Soil respiration in a Mediterranean oak forest at different developmental stages after coppicing, *Glob. Chang. Biol.*, 12, 110–121, <https://doi.org/10.1111/j.1365-2486.2005.01081.x>, 2006.

Thum, T., Aalto, T., Laurila, T., Aurela, M., Kolari, P. and Hari, P.: Parametrization of two photosynthesis models at the canopy scale in a northern boreal Scots pine forest, *Tellus, Ser. B Chem. Phys. Meteorol.*, 59, 874–890, <https://doi.org/10.1111/j.1600-0889.2007.00305.x>, 2007.

Ulke, A. G., Gattinoni, N. N. and Posse, G.: Analysis and modelling of turbulent fluxes in two different ecosystems in Argentina, *Int. J. Environ. and Pollut.*, 58(1/2), 52, 529 <https://doi.org/10.1504/ijep.2015.076583>, 2015.

Urbanski, S. et al.: Factors controlling CO<sub>2</sub> exchange on timescales from hourly to decadal at Harvard Forest, *J. Geophys. Res. Biogeosciences*, 112, <https://doi.org/10.1029/2006JG000293>, 2007.

Valentini, R., De Angelis, P., Matteucci, G., Monaco, R., Dore, S. and Scarascia Mugnozza, G. E.: Seasonal net carbon dioxide exchange of a beech forest with the atmosphere, *Glob. Chang. Biol.*, 2, 199–207, <https://doi.org/10.1111/j.1365-2486.1996.tb00072.x>, 1996.

Valentini, R., Matteucci, G., Dolman, A. J., Schulze, E. D., Rebmann, C., Moors, E. J., Granier, A., Gross, P., Jensen, N. O., Pilegaard, K., Lindroth, A., Grelle, A., Bernhofer, C., Grunwald, T., Aubinet, M., Ceulemans, R., Kowalski, A. S., Vesala, T., Rannik, U., Berbigier, P., Loustau, D., Guomundsson, J., Thorgeirsson, H., Ibrom, A., Morgenstern, K., Clement, R., Moncrieff, J., Montagnani, L., Minerbi, S. and Jarvis, P. G.: Respiration as the main determinant of carbon balance in European forests, *Nature*, 404(6780), 861-865, 2000.

van der Molen, M. K., Van Huissteden, J., Parmentier, F. J. W., Petrescu, A. M. R., Dolman, A. J., Maximov, T. C., Kononov, A. V., Karsanaev, S. V. and Suzdalov, D. A.: The growing season greenhouse gas balance of a continental tundra site in the Indigirka lowlands, NE Siberia, *Biogeosciences*, 4, 985–1003, <https://doi.org/10.5194/bg-4-985-2007>, 2007.

van Gorsel, E., Leuning, R., Cleugh, H. A., Keith, H., Kirschbaum, M. U. F. and Suni, T.: Application of an alternative method to derive reliable estimates of nighttime respiration from eddy covariance measurements in moderately complex topography, *Agr. Forest Meteorol.*, 148(6-7), 1174-1180, 2008.

Veenendaal, E. M., Kolle, O. and Lloyd, J.: Seasonal variation in energy fluxes and carbon dioxide exchange for a broad-leaved semi-arid savanna (Mopane woodland) in Southern Africa, *Glob. Change Biol.*, 10(3), 318-328, 2004.

Vitale, L., Tommasi, P. D., D'Urso, G. and Magliulo, V.: The response of ecosystem carbon fluxes to 534 LAI and environmental drivers in a maize crop grown in two contrasting seasons, *Int. J. Biometeorol.*, 60(3), 411–420, <https://doi.org/10.1007/s00484-015-1038-2>, 2015.

Wen, X. F., Wang, H. M., Wang, J. L., Yu, G. R. and Sun, X. M.: Ecosystem carbon exchanges of a subtropical 537 evergreen coniferous plantation subjected to seasonal drought, 2003-2007, *Biogeosciences*, 7(1), 357–369, 538, <https://doi.org/10.5194/bg-7-357-2010>, 2010.

Westergaard-Nielsen, A., Lund, M., Hansen, B. U. and Tamstorf, M. P.: Camera derived vegetation greenness index as proxy for gross primary production in a low Arctic wetland area, *ISPRS J. Photogramm. Remote Sens.*, 86, 89–99, <https://doi.org/10.1016/j.isprsjprs.2013.09.006>, 2013.

Wick, B., Veldkamp, E., de Mello, W. Z., Keller, M. and Crill, P.: Nitrous oxide fluxes and nitrogen cycling along a pasture chronosequence in Central Amazonia, Brazil, *Biogeosciences*, 2, 175–187, <https://doi.org/10.5194/bg-2-175-2005>, 2005.

Wohlfahrt, G., Hammerle, A., Haslwanter, A., Bahn, M., Tappeiner, U. and Cernusca, A.: Seasonal and inter-annual variability of the net ecosystem CO<sub>2</sub> exchange of a temperate mountain grassland: Effects of weather and management, *J. Geophys. Res-Atmos.*, 113(D8), 2008.

Yan, J., Zhang, Y., Yu, G., Zhou, G., Zhang, L., Li, K., Tan, Z. and Sha, L.: Seasonal and inter-annual 551 variations in net ecosystem exchange of two old-growth forests in southern China, *Agr. Forest Meteorol.*, 182-183, 257–265, <https://doi.org/10.1016/j.agrformet.2013.03.002>, 2013.

Yee, M. S., Pauwels, V. R. N., Daly, E., Beringer, J., Rüdiger, C., McCabe, M. F. and Walker, J. P.: A comparison of optical and microwave scintillometers with eddy covariance derived surface heat fluxes, *Agric. For. Meteorol.*, 213, 226–239, <https://doi.org/10.1016/j.agrformet.2015.07.004>, 2015.

Yi, C., Ricciuto, D., Li, R. et al.: Climate control of terrestrial carbon exchange across biomes and continents, *Environ. Res. Lett.*, 5, 1-10, 2010.

Zeller, K. F. and Nikolov, N. T.: Quantifying simultaneous fluxes of ozone, carbon dioxide and water vapor above a subalpine forest ecosystem, *Environ. Pollut.*, 107, 1–20, [https://doi.org/10.1016/S0269-7491\(99\)00156-6](https://doi.org/10.1016/S0269-7491(99)00156-6), 2000.

Zielis, S., Etzold, S., Zweifel, R., Eugster, W., Haeni, M. and Buchmann, N.: NEP of a Swiss subalpine forest is significantly driven not only by current but also by previous year's weather, *Biogeosciences*, 11, 1627–1635, <https://doi.org/10.5194/bg-11-1627-2014>, 2014.
