# Supplementary material for: How representative are FLUXNET measurements of surface fluxes during temperature extremes?
Source: Copernicus journal article supplement (doi:10.5194/bg-16-1829-2019), 2019-04-30
Supplement: Supplementary file 1 [file bg-16-1829-2019-supplement.zip › vanderHorst.supplementary.revised.pdf]

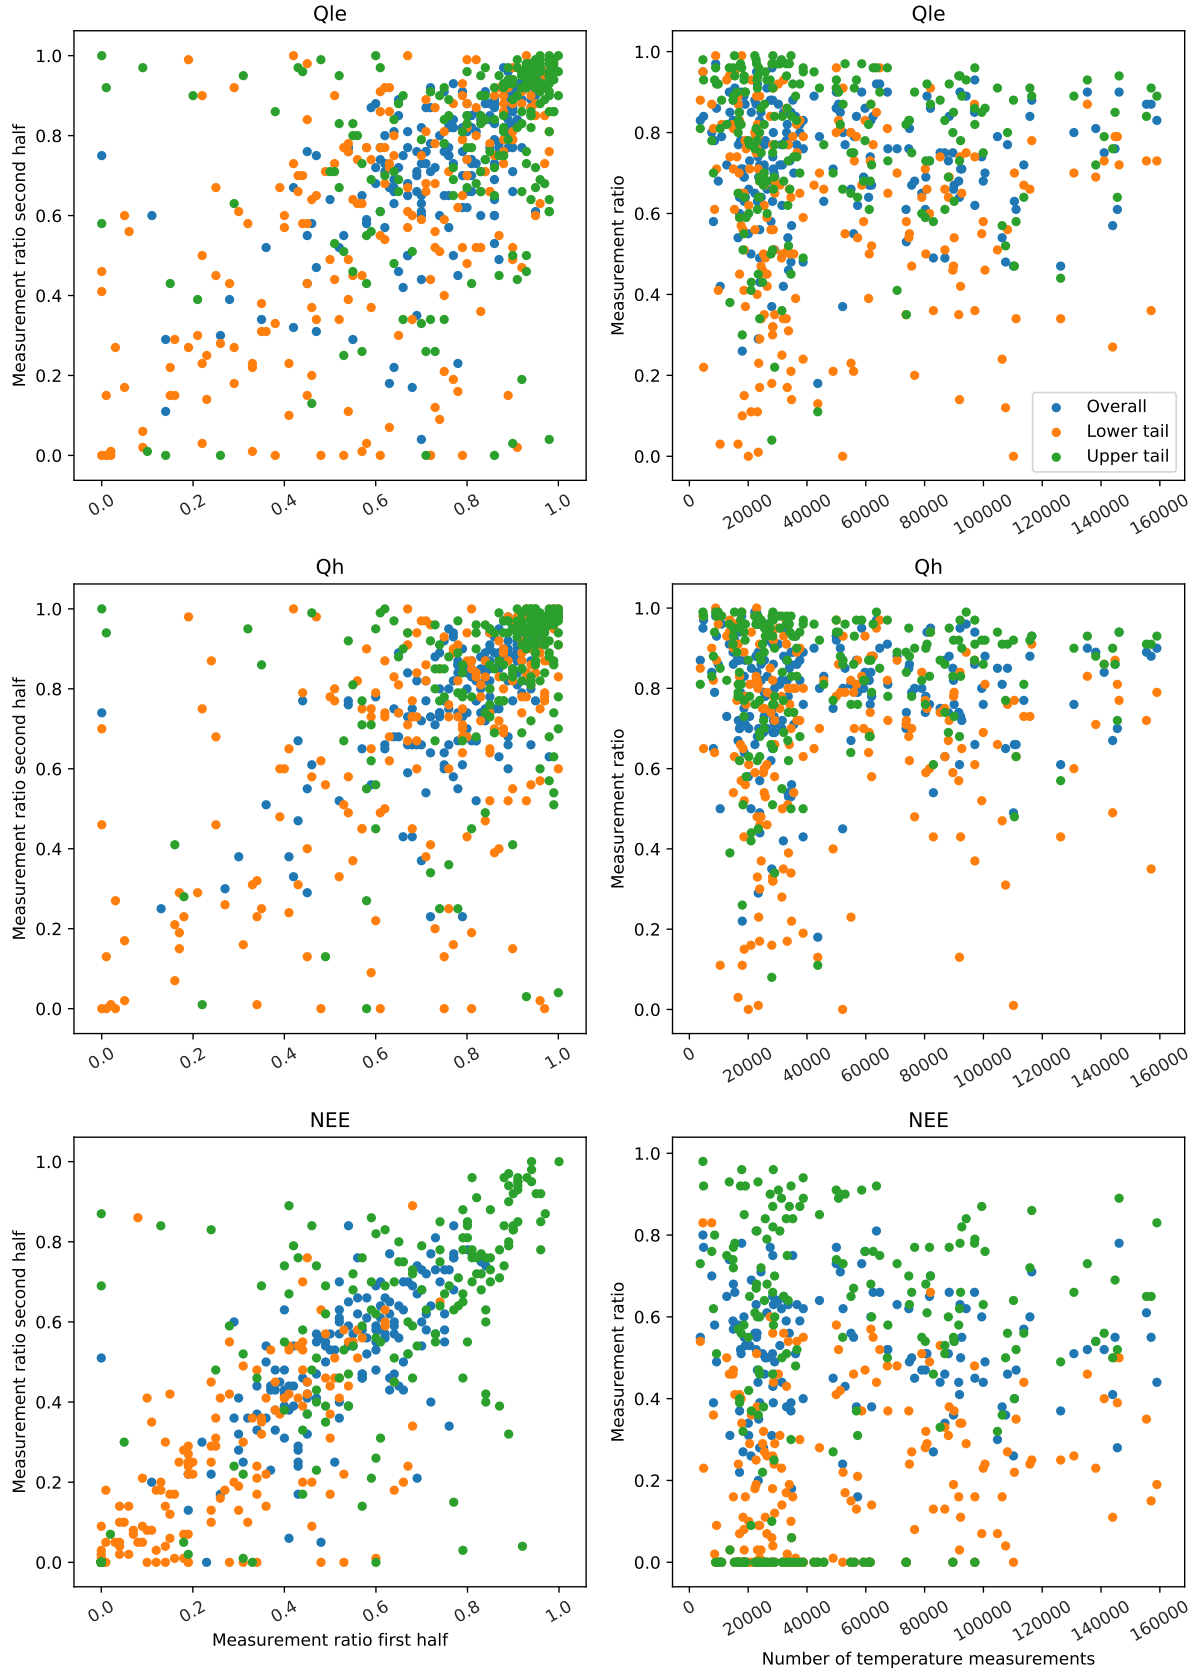

Figure S 1: The left panel shows the measurement ratios ( $Q_{le}$ ,  $Q_h$  and NEE) for the first half versus the second half of the data recorded. The right panel shows the relationship between the number of recorded temperatures and the measurement ratios of  $Q_{le}$ ,  $Q_h$  and NEE.

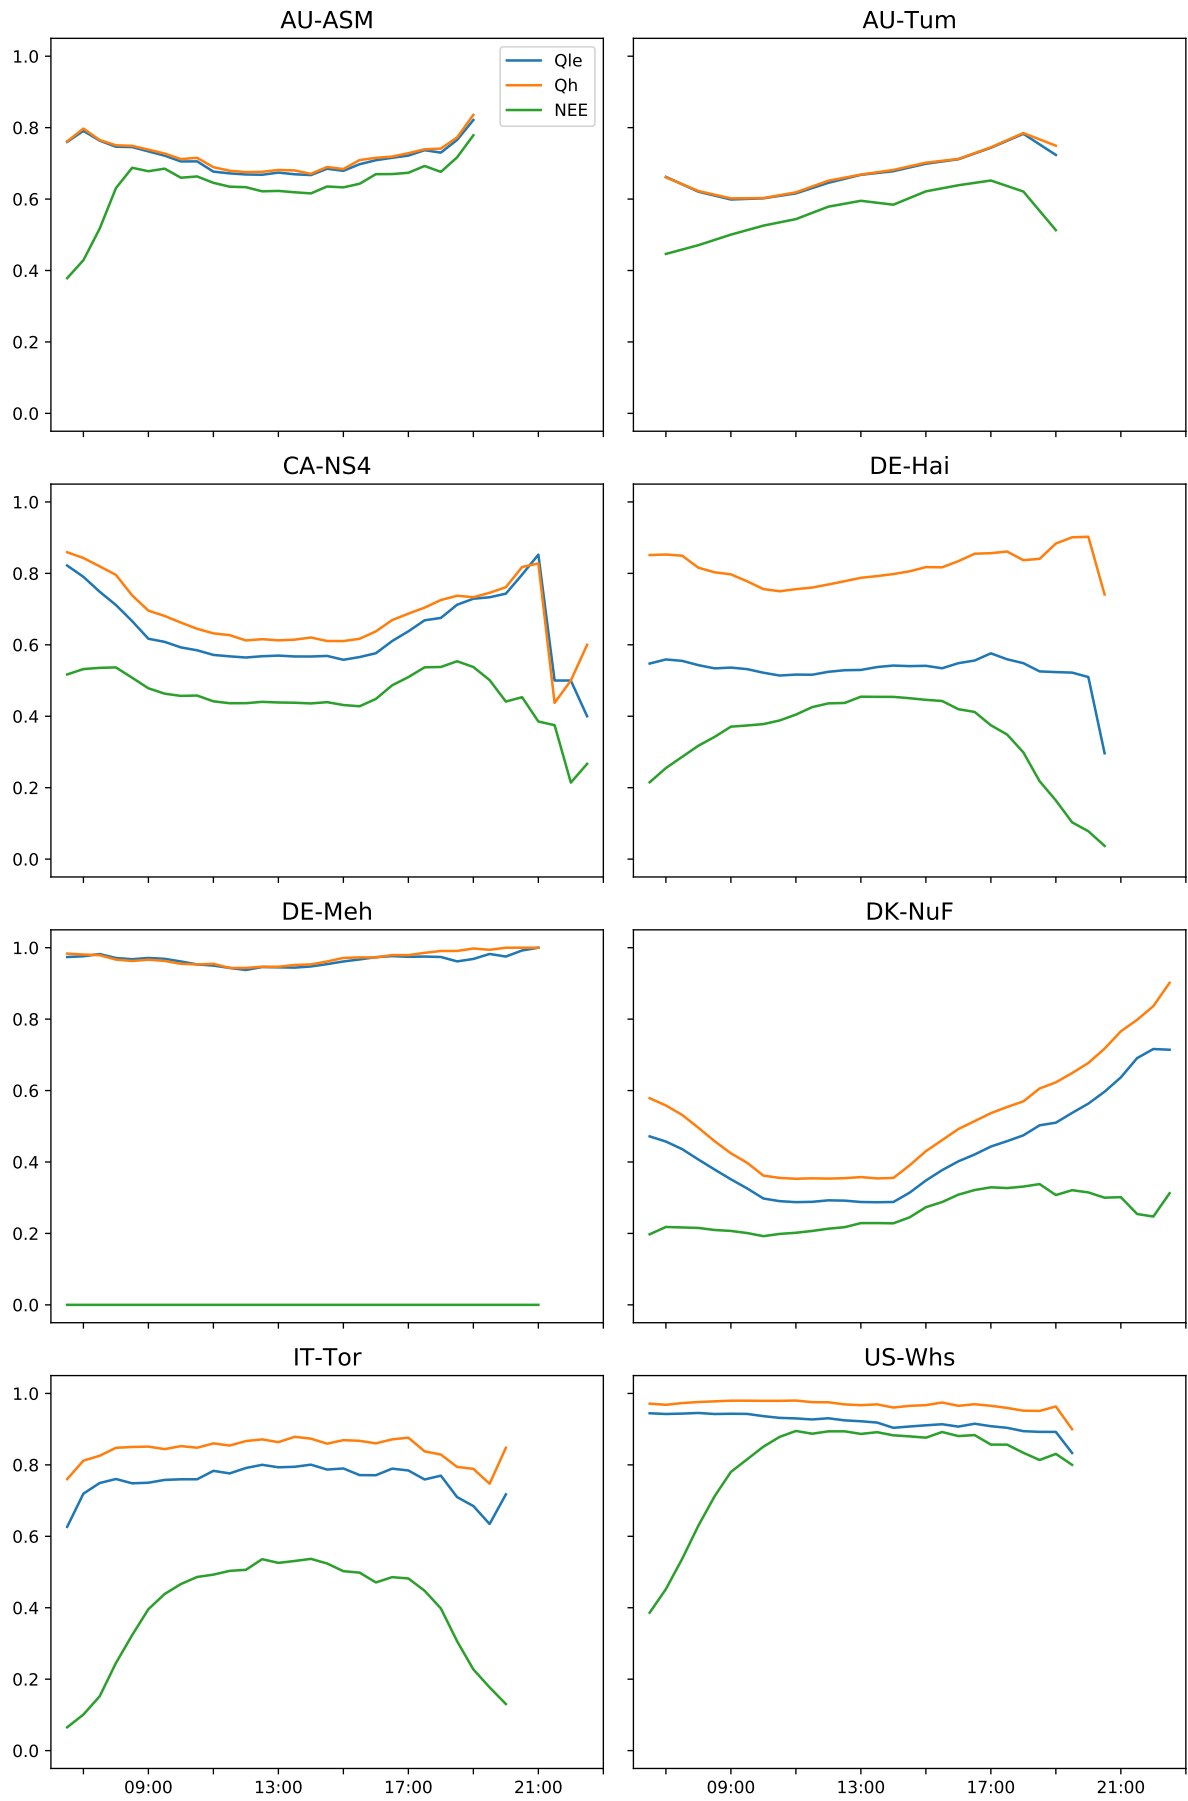

Figure S 2: Measurement ratio of  $Q_{le}$ ,  $Q_h$  and  $NEE$  by time of day for eight sites.

Table S 1: Selection of flux tower sites with the highest measurement ratios for all temperatures. Sites are selected where  $Q_{le}$ ,  $Q_h$ , and NEE measurement ratios are all above 0.9 or 0.8 and separately where  $Q_{le}$  and  $Q_h$  are above 0.9 or 0.8. Furthermore, the number of recorded temperatures per site, the dataset length and the ratio of measured temperatures are included.

### All temperatures

|        | $Q_{le}$ | $Q_h$ | NEE  | # Temp measurements | Length (days) | Ratio measured T |
|--------|----------|-------|------|---------------------|---------------|------------------|
| US-Whs | 0.92     | 0.97  | 0.81 | 63619               | 2922          | 0.93             |
| US-Wi0 | 0.95     | 0.95  | 0.80 | 4621                | 365           | 0.62             |
| AU-Ade | 0.90     | 0.91  | 0.74 | 13582               | 1096          | 0.51             |
| AU-RDF | 0.91     | 0.92  | 0.66 | 15459               | 1096          | 0.57             |
| AU-Stp | 0.90     | 0.92  | 0.77 | 49996               | 2557          | 0.80             |
| AU-Whr | 0.91     | 0.92  | 0.61 | 26359               | 1461          | 0.77             |
| CN-Du2 | 0.95     | 0.99  | 0.55 | 22861               | 1096          | 0.90             |
| CN-HaM | 0.90     | 0.98  | 0.78 | 17801               | 1096          | 0.67             |
| DE-Meh | 0.96     | 0.97  | 0.00 | 28118               | 1461          | 0.82             |
| DK-Sor | 0.90     | 0.94  | 0.78 | 146142              | 6940          | 0.92             |
| FR-Hes | 0.93     | 0.94  | 0.00 | 97072               | 3652          | 0.96             |
| IT-Mal | 0.90     | 0.94  | 0.00 | 15327               | 731           | 0.82             |
| PT-Mi2 | 0.92     | 0.96  | 0.00 | 23140               | 730           | 0.96             |
| US-MMS | 0.90     | 0.91  | 0.52 | 67330               | 5844          | 0.96             |
| US-NR1 | 0.90     | 0.90  | 0.52 | 135349              | 6209          | 0.96             |
| US-SP1 | 0.97     | 0.98  | 0.00 | 8940                | 365           | 1.00             |
| US-SRG | 0.90     | 0.95  | 0.73 | 58609               | 2557          | 0.97             |
| US-UMd | 0.92     | 0.90  | 0.66 | 64735               | 2922          | 0.92             |
| US-Wkg | 0.90     | 0.95  | 0.63 | 92041               | 4018          | 0.96             |
| AU-Cpr | 0.88     | 0.89  | 0.75 | 35162               | 1826          | 0.83             |
| AU-DaP | 0.80     | 0.80  | 0.62 | 52268               | 2557          | 0.82             |
| AU-DaS | 0.83     | 0.84  | 0.60 | 61724               | 2557          | 0.97             |
| AU-Emr | 0.85     | 0.85  | 0.69 | 21075               | 1096          | 0.85             |
| AU-Gin | 0.85     | 0.86  | 0.71 | 24353               | 1461          | 0.71             |
| AU-How | 0.85     | 0.86  | 0.66 | 96980               | 5113          | 0.78             |
| AU-Rig | 0.82     | 0.82  | 0.64 | 33284               | 1461          | 0.97             |
| CA-NS1 | 0.87     | 0.91  | 0.64 | 30269               | 1826          | 0.71             |
| CA-NS3 | 0.87     | 0.88  | 0.63 | 22689               | 1826          | 0.54             |
| CA-NS6 | 0.85     | 0.85  | 0.56 | 33987               | 1826          | 0.80             |
| CA-Qfo | 0.86     | 0.84  | 0.76 | 59740               | 2922          | 0.90             |
| CA-SF1 | 0.80     | 0.86  | 0.39 | 28541               | 1461          | 0.82             |
| CA-SF2 | 0.85     | 0.89  | 0.39 | 34566               | 1826          | 0.77             |
| CA-SF3 | 0.83     | 0.89  | 0.40 | 38701               | 2191          | 0.75             |
| CH-Dav | 0.83     | 0.90  | 0.44 | 158994              | 6574          | 0.93             |
| CN-Cng | 0.88     | 0.91  | 0.65 | 28335               | 1461          | 0.88             |
| DE-Geb | 0.84     | 0.88  | 0.60 | 115812              | 5113          | 1.00             |
| DE-Gri | 0.84     | 0.88  | 0.66 | 88364               | 4018          | 0.98             |
| DE-Obe | 0.84     | 0.87  | 0.38 | 56812               | 2557          | 0.99             |
| DE-Spw | 0.83     | 0.86  | 0.63 | 36581               | 1826          | 0.88             |
| DE-Tha | 0.87     | 0.89  | 0.61 | 155447              | 6940          | 0.99             |
| DE-Wet | 0.89     | 0.90  | 0.00 | 42399               | 1826          | 1.00             |
| DK-Lva | 0.89     | 0.96  | 0.00 | 18571               | 730           | 0.92             |
| DK-Ris | 0.83     | 0.87  | 0.00 | 16584               | 731           | 1.00             |
| ES-ES2 | 0.82     | 0.94  | 0.00 | 16924               | 730           | 0.97             |
| ES-Ln2 | 0.84     | 0.97  | 0.77 | 4836                | 365           | 0.54             |
| FI-Hyy | 0.87     | 0.88  | 0.55 | 157036              | 6940          | 0.97             |

|   |                                    |
|---|------------------------------------|
| ■ | $Q_{le}$ , $Q_h$ and NEE above 0.9 |
| ■ | $Q_{le}$ , $Q_h$ and NEE above 0.8 |
| ■ | $Q_{le}$ , $Q_h$ above 0.9         |
| ■ | $Q_{le}$ , $Q_h$ above 0.8         |

|        | Qle  | Qh   | NEE  | # Temp<br>measurements | Length<br>(days) | Ratio<br>measured T |
|--------|------|------|------|------------------------|------------------|---------------------|
| FR-Fon | 0.86 | 0.95 | 0.70 | 81997                  | 3652             | 0.98                |
| IL-Yat | 0.83 | 0.88 | 0.00 | 23883                  | 1095             | 0.89                |
| JP-SMF | 0.80 | 0.87 | 0.38 | 33042                  | 1826             | 0.80                |
| NO-Blv | 0.83 | 0.87 | 0.55 | 3716                   | 731              | 0.71                |
| PL-wet | 0.83 | 0.87 | 0.00 | 16164                  | 731              | 0.90                |
| RU-Fyo | 0.81 | 0.89 | 0.54 | 138202                 | 6209             | 0.98                |
| RU-Ha1 | 0.90 | 0.86 | 0.57 | 14961                  | 1096             | 0.55                |
| SE-Fla | 0.82 | 0.82 | 0.00 | 37584                  | 1826             | 0.87                |
| UK-Ham | 0.87 | 0.87 | 0.00 | 18946                  | 731              | 0.82                |
| UK-PL3 | 0.88 | 0.99 | 0.00 | 22245                  | 730              | 0.95                |
| US-AR1 | 0.85 | 0.88 | 0.65 | 32071                  | 1461             | 0.92                |
| US-AR2 | 0.88 | 0.92 | 0.77 | 27487                  | 1461             | 0.78                |
| US-ARM | 0.89 | 0.94 | 0.51 | 80808                  | 3653             | 0.92                |
| US-ARb | 0.83 | 0.89 | 0.59 | 14839                  | 730              | 0.87                |
| US-ARc | 0.88 | 0.94 | 0.68 | 14965                  | 730              | 0.88                |
| US-Blo | 0.81 | 0.86 | 0.49 | 74839                  | 4017             | 0.78                |
| US-MOz | 0.85 | 0.87 | 0.00 | 17034                  | 730              | 1.00                |
| US-Me6 | 0.80 | 0.87 | 0.59 | 37563                  | 1826             | 0.90                |
| US-Myb | 0.84 | 0.93 | 0.51 | 36121                  | 1826             | 0.84                |
| US-Ne1 | 0.85 | 0.90 | 0.71 | 51335                  | 4748             | 0.93                |
| US-Ne2 | 0.87 | 0.93 | 0.73 | 50723                  | 4748             | 0.91                |
| US-Ne3 | 0.86 | 0.93 | 0.73 | 49936                  | 4748             | 0.90                |
| US-ORv | 0.80 | 0.84 | 0.70 | 7616                   | 365              | 0.90                |
| US-SP2 | 0.80 | 0.81 | 0.00 | 54884                  | 2557             | 0.85                |
| US-SRM | 0.89 | 0.96 | 0.62 | 94133                  | 4018             | 0.99                |
| US-Tw3 | 0.85 | 0.94 | 0.31 | 13789                  | 730              | 0.84                |
| US-Tw4 | 0.86 | 0.93 | 0.49 | 9239                   | 730              | 0.64                |
| US-UMB | 0.84 | 0.88 | 0.66 | 62496                  | 5479             | 0.97                |
| US-Var | 0.88 | 0.93 | 0.71 | 116445                 | 5479             | 0.93                |

Table S 2: Selection of flux tower sites with the highest measurement ratios for temperatures in the lower extreme. Sites are selected where  $Q_{le}$ ,  $Q_h$ , and NEE measurement ratios are all above 0.9 or 0.8 and separately where  $Q_{le}$  and  $Q_h$  are above 0.9 or 0.8. Furthermore, the number of recorded temperatures per site, the dataset length and the ratio of measured temperatures are included.

### Lower extreme

|        | $Q_{le}$ | $Q_h$ | NEE  | # Temp measurements | Length (days) | Ratio measured T |
|--------|----------|-------|------|---------------------|---------------|------------------|
| US-ORv | 0.87     | 0.90  | 0.83 | 7616                | 365           | 0.90             |
| US-Wi0 | 0.95     | 0.98  | 0.83 | 4621                | 365           | 0.62             |
| AU-ASM | 0.91     | 0.92  | 0.44 | 28592               | 1461          | 0.83             |
| AU-Ade | 0.94     | 0.94  | 0.46 | 13582               | 1096          | 0.51             |
| AU-DaP | 0.91     | 0.93  | 0.22 | 52268               | 2557          | 0.82             |
| AU-Emr | 0.93     | 0.94  | 0.36 | 21075               | 1096          | 0.85             |
| AU-RDF | 0.95     | 0.96  | 0.41 | 15459               | 1096          | 0.57             |
| AU-Stp | 0.96     | 0.97  | 0.58 | 49996               | 2557          | 0.80             |
| AU-TTE | 0.93     | 0.93  | 0.50 | 12709               | 731           | 0.73             |
| CA-NS1 | 0.92     | 0.95  | 0.46 | 30269               | 1826          | 0.71             |
| CN-HaM | 0.99     | 0.99  | 0.34 | 17801               | 1096          | 0.67             |
| DE-Meh | 0.97     | 0.94  | 0.00 | 28118               | 1461          | 0.82             |
| FR-Fon | 0.91     | 0.94  | 0.66 | 81997               | 3652          | 0.98             |
| US-AR1 | 0.93     | 0.93  | 0.56 | 32071               | 1461          | 0.92             |
| US-SP1 | 0.99     | 1.00  | 0.00 | 8940                | 365           | 1.00             |
| US-UMd | 0.96     | 0.97  | 0.52 | 64735               | 2922          | 0.92             |
| AU-DaS | 0.87     | 0.88  | 0.57 | 61724               | 2557          | 0.97             |
| AU-GWW | 0.87     | 0.81  | 0.24 | 16649               | 730           | 0.98             |
| AU-How | 0.87     | 0.87  | 0.48 | 96980               | 5113          | 0.78             |
| CA-Qfo | 0.83     | 0.93  | 0.47 | 59740               | 2922          | 0.90             |
| CN-Du2 | 0.89     | 1.00  | 0.51 | 22861               | 1096          | 0.90             |
| DK-Fou | 0.81     | 0.82  | 0.36 | 8180                | 365           | 0.98             |
| DK-Ris | 0.89     | 0.91  | 0.00 | 16584               | 731           | 1.00             |
| IL-Yat | 0.89     | 0.91  | 0.00 | 23883               | 1095          | 0.89             |
| JP-SMF | 0.86     | 0.91  | 0.43 | 33042               | 1826          | 0.80             |
| NL-Lan | 0.82     | 0.98  | 0.00 | 10961               | 365           | 0.91             |
| NO-Blv | 0.88     | 0.85  | 0.54 | 3716                | 731           | 0.71             |
| PT-Mi2 | 0.82     | 0.98  | 0.00 | 23140               | 730           | 0.96             |
| SE-Fla | 0.83     | 0.90  | 0.00 | 37584               | 1826          | 0.87             |
| UK-PL3 | 0.80     | 0.98  | 0.00 | 22245               | 730           | 0.95             |
| US-AR2 | 0.84     | 0.85  | 0.60 | 27487               | 1461          | 0.78             |
| US-ARb | 0.82     | 0.91  | 0.46 | 14839               | 730           | 0.87             |
| US-ARc | 0.81     | 0.90  | 0.47 | 14965               | 730           | 0.88             |
| US-Aud | 0.82     | 0.89  | 0.00 | 36467               | 1826          | 0.82             |
| US-MMS | 0.81     | 0.82  | 0.48 | 67330               | 5844          | 0.96             |
| US-MOz | 0.83     | 0.83  | 0.00 | 17034               | 730           | 1.00             |
| US-NR1 | 0.87     | 0.83  | 0.46 | 135349              | 6209          | 0.96             |
| US-Ne2 | 0.83     | 0.86  | 0.52 | 50723               | 4748          | 0.91             |
| US-SP2 | 0.80     | 0.82  | 0.00 | 54884               | 2557          | 0.85             |
| US-Whs | 0.85     | 0.95  | 0.44 | 63619               | 2922          | 0.93             |

|                                                    |
|----------------------------------------------------|
| Q <sub>le</sub> , Q <sub>h</sub> and NEE above 0.9 |
| Q <sub>le</sub> , Q <sub>h</sub> and NEE above 0.8 |
| Q <sub>le</sub> , Q <sub>h</sub> above 0.9         |
| Q <sub>le</sub> , Q <sub>h</sub> above 0.8         |

Table S 3: Selection of flux tower sites with the highest measurement ratios for temperatures in the upper extreme. Sites are selected where  $Q_{le}$ ,  $Q_h$ , and NEE measurement ratios are all above 0.9 or 0.8 and separately where  $Q_{le}$  and  $Q_h$  are above 0.9 or 0.8. Furthermore, the number of recorded temperatures, the dataset length and the ratio of measured temperatures per site are included.

### Upper extreme

|        | $Q_{le}$ | $Q_h$ | NEE  | # Temp measurements | Length (days) | Ratio measured T |
|--------|----------|-------|------|---------------------|---------------|------------------|
| AU-Ade | 0.96     | 0.96  | 0.93 | 13582               | 1096          | 0.51             |
| CA-NS1 | 0.97     | 0.98  | 0.91 | 30269               | 1826          | 0.71             |
| CA-SF1 | 0.97     | 0.97  | 0.96 | 28541               | 1461          | 0.82             |
| CA-SF2 | 0.99     | 0.98  | 0.92 | 34566               | 1826          | 0.77             |
| CA-SF3 | 0.96     | 0.96  | 0.94 | 38701               | 2191          | 0.75             |
| CN-Cha | 0.94     | 0.98  | 0.93 | 23345               | 1096          | 1.00             |
| CN-Dan | 0.97     | 0.97  | 0.92 | 17384               | 731           | 1.00             |
| CN-HaM | 0.96     | 0.99  | 0.96 | 17801               | 1096          | 0.67             |
| ES-Ln2 | 0.93     | 0.98  | 0.92 | 4836                | 365           | 0.54             |
| IT-Tor | 0.97     | 0.96  | 0.90 | 52953               | 2557          | 0.93             |
| US-AR2 | 0.93     | 0.95  | 0.90 | 27487               | 1461          | 0.78             |
| US-Cop | 0.90     | 0.96  | 0.92 | 19053               | 1825          | 0.89             |
| US-Ne3 | 0.91     | 0.97  | 0.91 | 49936               | 4748          | 0.90             |
| US-SRG | 0.97     | 0.97  | 0.91 | 58609               | 2557          | 0.97             |
| US-Whs | 0.96     | 0.99  | 0.92 | 63619               | 2922          | 0.93             |
| US-Wi0 | 0.98     | 0.99  | 0.98 | 4621                | 365           | 0.62             |
| AU-Cpr | 0.92     | 0.93  | 0.84 | 35162               | 1826          | 0.83             |
| AU-Dry | 0.91     | 0.92  | 0.85 | 44245               | 2557          | 0.71             |
| AU-Rob | 0.93     | 0.94  | 0.80 | 8581                | 365           | 0.99             |
| AU-Ync | 0.94     | 0.96  | 0.85 | 18643               | 1096          | 0.73             |
| BR-Sa3 | 0.91     | 0.93  | 0.87 | 28366               | 1827          | 0.69             |
| CA-NS2 | 0.98     | 0.98  | 0.89 | 31329               | 1826          | 0.72             |
| CA-NS3 | 0.98     | 0.96  | 0.81 | 22689               | 1826          | 0.54             |
| CA-NS5 | 0.97     | 0.96  | 0.84 | 32935               | 1826          | 0.78             |
| CA-NS6 | 0.97     | 0.96  | 0.87 | 33987               | 1826          | 0.80             |
| CA-NS7 | 0.99     | 0.99  | 0.82 | 28398               | 1461          | 0.80             |
| CH-Dav | 0.89     | 0.93  | 0.83 | 158994              | 6574          | 0.93             |
| CN-Qia | 0.95     | 0.93  | 0.84 | 25817               | 1096          | 1.00             |
| DE-Akm | 0.95     | 0.97  | 0.89 | 38744               | 2191          | 0.78             |
| DE-RuR | 0.97     | 0.95  | 0.81 | 30769               | 1461          | 0.90             |
| DK-Sor | 0.94     | 0.94  | 0.89 | 146142              | 6940          | 0.92             |
| GF-Guy | 0.85     | 0.92  | 0.87 | 99422               | 4018          | 1.00             |
| US-Los | 0.89     | 0.90  | 0.82 | 92645               | 4018          | 1.00             |
| US-Me6 | 0.92     | 0.94  | 0.87 | 37563               | 1826          | 0.90             |
| US-Ne1 | 0.82     | 0.88  | 0.90 | 51335               | 4748          | 0.93             |
| US-Ne2 | 0.90     | 0.94  | 0.89 | 50723               | 4748          | 0.91             |
| US-SRM | 0.93     | 0.99  | 0.84 | 94133               | 4018          | 0.99             |
| US-Var | 0.89     | 0.93  | 0.86 | 116445              | 5479          | 0.93             |
| AU-RDF | 0.94     | 0.95  | 0.78 | 15459               | 1096          | 0.57             |
| AU-Stp | 0.93     | 0.94  | 0.74 | 49996               | 2557          | 0.80             |
| AU-Whr | 0.93     | 0.94  | 0.79 | 26359               | 1461          | 0.77             |
| AU-Wom | 0.96     | 0.96  | 0.47 | 23571               | 1096          | 0.92             |

|   |                                    |
|---|------------------------------------|
| ■ | $Q_{le}$ , $Q_h$ and NEE above 0.9 |
| ■ | $Q_{le}$ , $Q_h$ and NEE above 0.8 |
| ■ | $Q_{le}$ , $Q_h$ above 0.9         |
| ■ | $Q_{le}$ , $Q_h$ above 0.8         |

|        | Qle  | Qh   | NEE  | # Temp<br>measurements | Length<br>(days) | Ratio<br>measured T |
|--------|------|------|------|------------------------|------------------|---------------------|
| BE-Lon | 0.94 | 0.92 | 0.58 | 91604                  | 4018             | 0.95                |
| CH-Fru | 0.90 | 0.90 | 0.77 | 76597                  | 3652             | 0.90                |
| CN-Du2 | 0.97 | 0.98 | 0.68 | 22861                  | 1096             | 0.90                |
| DE-Geb | 0.91 | 0.92 | 0.72 | 115812                 | 5113             | 1.00                |
| DE-Gri | 0.92 | 0.95 | 0.77 | 88364                  | 4018             | 0.98                |
| DE-Meh | 0.97 | 0.98 | 0.00 | 28118                  | 1461             | 0.82                |
| DE-Obe | 0.93 | 0.97 | 0.37 | 56812                  | 2557             | 0.99                |
| DE-Wet | 0.95 | 0.96 | 0.00 | 42399                  | 1826             | 1.00                |
| DK-Lva | 0.93 | 0.94 | 0.00 | 18571                  | 730              | 0.92                |
| FI-Hyy | 0.91 | 0.91 | 0.65 | 157036                 | 6940             | 0.97                |
| FI-Kaa | 0.91 | 0.93 | 0.00 | 56096                  | 2557             | 0.94                |
| FR-Hes | 0.96 | 0.97 | 0.00 | 97072                  | 3652             | 0.96                |
| IT-Mal | 0.99 | 0.99 | 0.00 | 15327                  | 731              | 0.82                |
| JP-SMF | 0.94 | 0.98 | 0.51 | 33042                  | 1826             | 0.80                |
| PT-Mi1 | 0.92 | 0.99 | 0.00 | 9826                   | 365              | 1.00                |
| PT-Mi2 | 0.91 | 0.97 | 0.00 | 23140                  | 730              | 0.96                |
| RU-Ha1 | 0.96 | 0.95 | 0.72 | 14961                  | 1096             | 0.55                |
| UK-Ham | 0.90 | 0.92 | 0.00 | 18946                  | 731              | 0.82                |
| UK-PL3 | 0.99 | 0.98 | 0.00 | 22245                  | 730              | 0.95                |
| US-ARM | 0.92 | 0.91 | 0.61 | 80808                  | 3653             | 0.92                |
| US-Bkg | 0.93 | 0.96 | 0.00 | 23025                  | 1096             | 0.88                |
| US-MMS | 0.96 | 0.97 | 0.50 | 67330                  | 5844             | 0.96                |
| US-Me2 | 0.91 | 0.94 | 0.32 | 104775                 | 4748             | 0.97                |
| US-NR1 | 0.93 | 0.93 | 0.73 | 135349                 | 6209             | 0.96                |
| US-SP1 | 0.96 | 0.99 | 0.00 | 8940                   | 365              | 1.00                |
| US-Tw4 | 0.92 | 0.98 | 0.51 | 9239                   | 730              | 0.64                |
| US-UMB | 0.96 | 0.96 | 0.76 | 62496                  | 5479             | 0.97                |
| US-Wkg | 0.94 | 0.97 | 0.78 | 92041                  | 4018             | 0.96                |
| AR-Vir | 0.82 | 0.81 | 0.56 | 17605                  | 1461             | 0.55                |
| AU-DaP | 0.87 | 0.87 | 0.73 | 52268                  | 2557             | 0.82                |
| AU-DaS | 0.87 | 0.87 | 0.68 | 61724                  | 2557             | 0.97                |
| AU-GWW | 0.83 | 0.81 | 0.57 | 16649                  | 730              | 0.98                |
| AU-Gin | 0.86 | 0.87 | 0.72 | 24353                  | 1461             | 0.71                |
| AU-How | 0.86 | 0.87 | 0.78 | 96980                  | 5113             | 0.78                |
| AU-Rig | 0.86 | 0.87 | 0.75 | 33284                  | 1461             | 0.97                |
| AU-TTE | 0.82 | 0.82 | 0.75 | 12709                  | 731              | 0.73                |
| CA-Man | 0.80 | 0.91 | 0.56 | 108191                 | 5479             | 0.84                |
| CA-Mer | 0.82 | 0.87 | 0.00 | 60953                  | 2922             | 0.94                |
| CH-Lae | 0.85 | 0.92 | 0.55 | 89831                  | 4018             | 0.92                |
| CH-Oe2 | 0.86 | 0.92 | 0.76 | 100545                 | 4018             | 0.97                |
| CZ-BK1 | 0.87 | 0.95 | 0.64 | 25519                  | 1827             | 0.61                |
| DE-Kli | 0.83 | 0.86 | 0.51 | 86866                  | 4018             | 0.97                |
| DE-Lkb | 0.84 | 0.83 | 0.06 | 34756                  | 1826             | 0.85                |
| DE-RuS | 0.81 | 0.96 | 0.67 | 22710                  | 1461             | 0.65                |

|        | Qle  | Qh   | NEE  | # Temp<br>measurements | Length<br>(days) | Ratio<br>measured T |
|--------|------|------|------|------------------------|------------------|---------------------|
| DE-Seh | 0.84 | 0.90 | 0.70 | 28985                  | 1461             | 0.83                |
| DE-Tha | 0.84 | 0.91 | 0.65 | 155447                 | 6940             | 0.99                |
| DK-ZaH | 0.88 | 0.92 | 0.64 | 110222                 | 5479             | 1.00                |
| ES-ES2 | 0.85 | 0.95 | 0.00 | 16924                  | 730              | 0.97                |
| FR-Fon | 0.87 | 0.94 | 0.70 | 81997                  | 3652             | 0.98                |
| FR-Lq2 | 0.82 | 0.89 | 0.00 | 25451                  | 1096             | 1.00                |
| FR-Pue | 0.89 | 0.90 | 0.66 | 130776                 | 5479             | 0.99                |
| HU-Bug | 0.84 | 0.84 | 0.00 | 31603                  | 1826             | 0.81                |
| IL-Yat | 0.80 | 0.88 | 0.00 | 23883                  | 1095             | 0.89                |
| IT-Lav | 0.82 | 0.91 | 0.79 | 97096                  | 4383             | 0.96                |
| IT-Ro2 | 0.83 | 0.95 | 0.70 | 74622                  | 3653             | 0.87                |
| NL-Lan | 0.88 | 0.98 | 0.00 | 10961                  | 365              | 0.91                |
| NL-Loo | 0.85 | 0.86 | 0.69 | 144770                 | 6575             | 0.95                |
| NO-Blv | 0.81 | 0.81 | 0.73 | 3716                   | 731              | 0.71                |
| PL-wet | 0.90 | 0.89 | 0.00 | 16164                  | 731              | 0.90                |
| US-ARb | 0.88 | 0.91 | 0.74 | 14839                  | 730              | 0.87                |
| US-ARc | 0.89 | 0.93 | 0.77 | 14965                  | 730              | 0.88                |
| US-Aud | 0.83 | 0.90 | 0.00 | 36467                  | 1826             | 0.82                |
| US-Bar | 0.81 | 0.85 | 0.00 | 10474                  | 365              | 1.00                |
| US-Blo | 0.83 | 0.88 | 0.63 | 74839                  | 4017             | 0.78                |
| US-Bo1 | 0.80 | 0.83 | 0.00 | 89610                  | 4383             | 0.86                |
| US-GLE | 0.88 | 0.87 | 0.33 | 85279                  | 4018             | 0.93                |
| US-Ho1 | 0.82 | 0.89 | 0.00 | 73675                  | 3288             | 0.99                |
| US-MOz | 0.82 | 0.84 | 0.00 | 17034                  | 730              | 1.00                |
| US-Myb | 0.89 | 0.93 | 0.48 | 36121                  | 1826             | 0.84                |
| US-UMd | 0.90 | 0.85 | 0.75 | 64735                  | 2922             | 0.92                |
